# Supplementary material for: Two years of Volatile Organic Compounds online in-situ measurements at SIRTA (Paris region, France) using Proton-Transfer-Reaction Mass Spectrometry
Source: Copernicus journal article supplement (doi:10.5194/essd-2022-406), 2022-12-05
Supplement: Supplementary file 1 [file essd-2022-406-supplement.pdf]

## Supplement to

# Two years of Volatile Organic Compounds online in-situ measurements at SIRTAs (Paris region, France) using Proton-Transfer-Reaction Mass Spectrometry

5 Leïla Simon, Valérie Gros et al

Correspondence to: Valérie Gros (valerie.gros@lsce.ipsl.fr)

### Section 1: Supplementary text to the Instrumentation

#### Text S1: Kinetic approach for volume mixing ratio calculation using instrumental transmission

To obtain the sensitivity (in ncps/ppb) of compounds not present in the calibration standard, first the transmission of  
10 compounds present in the standard is calculated, based on the instrument's parameters and following Equation S1 (Taipale et al., 2008):

$$\frac{T_{RH^+}}{T_{H_3O^+}} = 10^9 \frac{p_{drift}}{I_{norm} p_{norm}} \frac{\mu_0 N_0}{kL} \frac{E}{N^2} S_{norm}$$

With  $p_{drift}$  being the drift pressure,  $I_{norm}$  the normalized intensity (equal to  $10^6$ ),  $p_{norm}$  the normal pressure,  $\mu_0$  being the reduced  
ion mobility of the primary ions and equal to  $2.8 \text{ cm}^2 \cdot \text{V}^{-1} \cdot \text{s}^{-1}$ ,  $N_0$  the number density of air at standard conditions,  $k$  being the  
15 reaction rate constant of the given compound (from Zhao and Zhang, 2004; Španěl et al., 1998 and 2002; Lindinger et al.,  
1998; if not known, a rate of  $3 \cdot 10^{-9}$  is taken),  $L$  the length of the drift tube,  $E = U_{drift}/L$ ,  $N = N_A p_{drift}/(RT_{drift})$ , and  $S_{norm}$  the  
normalized sensitivity obtained by a standard calibration.

From the transmission coefficients of calibrated  $m/z$ , a transmission curve is modelled, from which the transmission  
coefficients of the other  $m/z$  are extracted and used to retrieve the sensitivity ( $S_{norm}$ ) using a reversed equation of (S1).

20

#### Text S2: Concentration calculation from volume mixing ratios (VMR)

The results in this paper are expressed in concentrations ( $\mu\text{g} \cdot \text{m}^{-3}$ ), calculated from the VMR (ppb) following Equation S2:

$$\text{Concentration} = \text{VMR} \cdot \frac{M}{V_{air} \frac{T_{atm}}{T_0} \frac{P_0}{P_{atm}}}$$

With  $M$  the molar mass of the compound,  $V_{air}$  the standard volume of air equal to 22.41 L,  $T_{atm}$  the atmospheric temperature  
25 in K,  $T_0$  the standard temperature of 273.15 K,  $P_0$  the standard atmospheric pressure of 1 013.25 hPa, and  $P_{atm}$  the atmospheric  
pressure in hPa.

**Text S3: Discussion for tentative attribution of the measured  $m/z$ , based on PTR-ToF-MS measurements and the literature**

$m/z$  31 mostly corresponds to  $\text{CH}_2\text{O}$  (formaldehyde), which cannot be precisely quantified by PTR-MS, due to its proton affinity being too close to that of water, and is thus defined as its proxy.  $m/z$  33 corresponds to  $\text{CH}_3\text{OH}$  (methanol), the main alcohol present in the atmosphere, and is also the most important oxygenated VOC; although at this mass there are interferences from  $\text{O}_2^+$ , thus resulting in a high background. At  $m/z$  42,  $\text{CH}_3\text{CN}$  (acetonitrile) is the main compound measured; interferences from other compounds are negligible (Yuan et al., 2017b). Acetaldehyde is the main component detected at  $m/z$  45, for which the main source is biomass burning.  $m/z$  46 can correspond to several compounds: it was mostly identified as  $\text{CH}_3\text{NO}$  and  $\text{C}_2\text{H}_7\text{N}$ , respectively formamide and dimethylamine, both compounds emitted by agricultural activities (Yuan et al., 2017a; Kammer et al., 2019). However, a few studies reported this mass as  $\text{NO}_2^+$ , that would correspond notably to peroxyacetyl nitrate (PAN) fragmentations (Yuan et al., 2017b) or other organic nitrates (Aoki et al., 2007; Duncianu et al., 2017), but cannot be precisely quantify using  $\text{H}_3\text{O}^+$  ionization. In this study, we will refer to it as  $m/z$  46 (or  $m/z$  46).  $m/z$  47 corresponds to  $\text{C}_2\text{H}_6\text{O}$  (ethanol) and  $\text{CH}_2\text{O}_2$  (formic acid) and will therefore be referred to as their sum, although the sensitivity of ethanol is lower than that of formic acid. Their seasonal contribution can be found in Table 2, and shows that  $m/z$  47 is dominated by formic acid in spring and summer (> 90%), but in autumn and winter, ethanol contribution becomes significant. This is a similar trend to that of furan's and isoprene's contributions to  $m/z$  69.  $m/z$  57 is usually attributed to propanal ( $\text{C}_3\text{H}_4\text{O}$ ) (Knighton et al., 2007; Languille et al., 2020), but there are interferences from  $\text{C}_4\text{H}_8$ : butenes or other hydrocarbons' fragmentations, that cannot be precisely quantified but seem to be dominant in our study (Table 2).  $m/z$  58 corresponds to allylamine, a compound emitted by agricultural activities (Kammer et al., 2019).  $m/z$  59 could be correspond to  $\text{C}_3\text{H}_6\text{O}$  (acetone + propanal),  $\text{C}_4\text{H}_{10}$  (butane) and  $\text{C}_2\text{H}_2\text{O}_2$  (glyoxal); PTR-ToF-MS measurements showed that in all seasons,  $\text{C}_3\text{H}_6\text{O}$  is dominant by about 97%. de Gouw and Warneke (2007) indicated that propanal is also negligible and  $m/z$  59 can be regarded as acetone only.  $m/z$  60 corresponds mainly to trimethylamine, which is mostly emitted by agricultural activities (Kammer et al., 2019).  $m/z$  61 is attributed to acetic acid, an agricultural and biogenic compound.  $m/z$  63 corresponds to dimethylsulfide, emitted by phytoplanktonic activities in the oceans.  $m/z$  69 corresponds to  $\text{C}_4\text{H}_4\text{O}$ : furan and  $\text{C}_5\text{H}_8$ : isoprene and fragments of methylbutenol (MBO), but PTR-ToF-MS measurements showed that MBO is negligible (see discussion of  $m/z$  87). Furan is emitted by biomass-burning activities and has highest contributions in autumn and winter; while in spring and summer,  $m/z$  69 can be almost exclusively attributed to isoprene, due to its important biogenic source, although it can also be emitted by anthropogenic sources (Borbon et al., 2001; Wagner and Kuttler, 2014; Panopoulou, 2020).  $m/z$  71 corresponds mainly (by about 85%) to  $\text{C}_4\text{H}_6\text{O}$ , the sum of methyl vinyl ketone (MVK), methacrolein (MACR), ISOPOOH, and crotonaldehyde. ISOPOOH are formed from isoprene oxidation under low  $\text{NO}_x$  conditions (Surratt et al., 2010; Budisulistiorini et al., 2013), and so are expected to be low in a suburban area. In summer, MVK + MACR would be dominant as they are the main isoprene oxidation products, and crotonaldehyde might dominate  $m/z$  71 in winter, due to its wood burning source (Lipari et al., 1984; Languille et al., 2020). Due to its overall higher level in summer, this  $m/z$  will be considered as MVK + MACR.  $m/z$  73 is mainly attributed to methyl ethyl ketone (MEK) in ambient air (Yuan et al., 2017b).  $m/z$  75 was identified as  $\text{C}_3\text{H}_6\text{O}_2$

60 (methylacetate, hydroxyacetone, propanoic acid); methylacetate would be a biomass burning compound (Bruns et al., 2017),  
while hydroxyacetone and propanoic acid are of biogenic origins (Yuan et al., 2017b). It is not possible to separate these  
compounds because they are isomers, but methylacetate is expected to be the dominant VOC in winter and hydroxyacetone +  
propanoic acid to be dominant in summer.  $m/z$  79 corresponds to benzene ( $C_6H_6$ ).  $m/z$  81 corresponds to fragments of  
65 monoterpenes (mostly) and of PAHs.  $m/z$  83 was identified as methylfuran ( $C_5H_6O$ ), that can be found in biomass burning  
plumes (Bruns et al., 2016), and as a minor oxidation product of isoprene (Kroll et al., 2006; and references therein). This mass  
was also identified as  $C_6H_{10}$ , fragments of hydrocarbons (HC) from gasoline and diesel cars (Gueneron et al., 2015). In winter  
and autumn, methylfuran is dominant (Table 2) while  $C_6H_{10}$  is significant in spring and summer.  $m/z$  85 mainly corresponds  
to methylbutenone ( $C_5H_8O$ ), identified as a biomass burning compound, by (Bruns et al., 2017) and as a biogenic compound  
by Kroll et al. (2006).  $m/z$  87 corresponds to  $C_4H_6O_2$  (butanedione + methacrylic acid) and  $C_5H_{10}O$  (methylbutenol, MBO).  
70 Butanedione was found in biomass burning plumes (Bruns et al., 2017), methacrylic acid was identified as an isoprene  
oxidation product (Williams et al., 2001; Nguyen, 2012) and MBO was shown to be emitted by biogenic sources (Holzinger  
et al, 2005; Kim et al., 2010). PTR-ToF-MS measurements showed that  $C_4H_6O_2$  is dominant (> 80%), thus butanedione would  
be the main compound in winter and methacrylic acid (MAA) in summer.  $m/z$  93 corresponds to toluene ( $C_7H_8$ ), a major traffic  
compound.  $m/z$  97 can be attributed to several compounds such as  $C_2$ -substituted furans and furaldehydes (Yuan et al., 2017b),  
75 but Bruns et al. (2017) reported this mass as furfural ( $C_5H_4O_2$ ) in biomass-burning influenced regions, and Languille et al.  
(2020) also defined  $m/z$  97 as furfural in winter at SIRT.  $m/z$  99 was identified as  $C_5H_6O_2$  (furfuryl alcohol) by (Stockwell  
et al., 2015), and as  $C_4H_2O_3$  (furanedione) by Bruns et al. (2017), both present in aged biomass burning plumes. In this study,  
both compounds are present so this mass will be regarded as their sum.  $m/z$  107 corresponds to  $C_8H_{10}$  ( $C_8$ -aromatics: xylenes,  
ethylbenzene) and  $C_7H_6O$  (benzaldehyde);  $C_8$ -aromatics are dominant by about 80% (Table 2), and thus this mass will be  
80 regarded as mainly  $C_8$ -aromatics.  $m/z$  111 was identified as benzenediol by Bruns et al. (2016) as a biomass burning compound.  
 $m/z$  121 corresponds to  $C_9$ -aromatics (trimethylbenzenes), mainly emitted by traffic.  $m/z$  137 corresponds to monoterpenes,  
for which the main source is supposed to be biogenic, although anthropogenic sources, traffic and wood burning, were  
identified recently (Panopoulou et al., 2020).  $m/z$  139 corresponds to nopinone, an oxidation product of monoterpenes.  $m/z$  147  
corresponds to dichlorobenzene.  $m/z$  151 is identified as  $C_9H_{10}O_2$ , pinonaldehyde, an alpha-pinene ozonolysis product.  
85 Pinonaldehyde is measured at  $m/z$  169 and at  $m/z$  151, which corresponds to pinonaldehyde- $H_2O$ .

## Section 2: Tables and Figures

**Table S1: Instrument parameters throughout the two-year measurement period**

| Name                             | Symbol                   | Value (unit)             |
|----------------------------------|--------------------------|--------------------------|
| Pressure in the drift chamber    | $P_{\text{drift}}$       | 2.2 mbar                 |
| Temperature in the drift chamber | $T_{\text{drift}}$       | 40 °C                    |
| Temperature in the inlet tube    | $T_{\text{inlet}}$       | 40 °C                    |
| Voltage in the drift chamber     | $U_{\text{drift}}$       | 600 V                    |
| Water flow                       | $F_{\text{H}_2\text{O}}$ | 5–8 mL·min <sup>-1</sup> |
| Voltage                          | $U_{\text{SO}}$          | 90–130 V                 |
| Voltage                          | $U_{\text{S}}$           | 80–120 V                 |
| Source intensity                 | $I_{\text{hc}}$          | 3–6 mA                   |
| Voltage in the SEM               | $U_{\text{SEM}}$         | 2000–3500 V              |
| Drift tube length                | $L$                      | 9.2 cm                   |
| Collision energy                 | $E/N$                    | 134.4 Td                 |

90

**Table S2: Standard canisters used for calibration throughout the two-year measurement period**

| Start     | End        | Reference of standard   | Composition                                                                                                                                                      | VMR     |
|-----------|------------|-------------------------|------------------------------------------------------------------------------------------------------------------------------------------------------------------|---------|
| 1/18/2020 | 9/10/2020  | R0904, Ionicon Analytik | Methanol, Acetonitrile, Acetaldehyde, Acrolein, Acetone, Isoprene, Crotonaldehyde, 2-Butanone, Benzene, Toluene, o-Xylene, $\alpha$ -pinene, 1,2-Dichlorobenzene | 1 ppm   |
| 9/10/2020 | 6/15/2021  | L5387, Ionicon Analytik | Methanol, Acetonitrile, Acetone, Isoprene, Benzene, Toluene, Xylenes, Trimethylbenzene, 1,2-Dichlorobenzene                                                      | 100 ppb |
| 9/1/2021  | 12/31/2021 | D155286, SIAD           | Methanol, Acetonitrile, Acetaldehyde, Acrolein, Acetone, MEK, Benzene, Toluene, o-Xylene, $\alpha$ -pinene, 1,2-Dichlorobenzene                                  | 1 ppm   |

95

**Table S3: Descriptive statistics obtained for 2020 and 2021. Values are in  $\mu\text{g}\cdot\text{m}^{-3}$**

|                                                    | Mean<br>2020 | Median<br>2020 | 25th<br>percentile<br>2020 | 75th<br>percentile<br>2020 | sigma<br>2020 | Mean<br>2021 | Median<br>2021 | 25th<br>percentile<br>2021 | 75th<br>percentile<br>2021 | sigma<br>2021 |
|----------------------------------------------------|--------------|----------------|----------------------------|----------------------------|---------------|--------------|----------------|----------------------------|----------------------------|---------------|
| Methanol                                           | 3.90         | 2.78           | 1.30                       | 5.18                       | 3.89          | 3.90         | 2.81           | 1.74                       | 4.70                       | 3.51          |
| Acetone                                            | 2.61         | 2.05           | 1.19                       | 3.23                       | 2.10          | 2.30         | 1.71           | 1.10                       | 2.97                       | 1.81          |
| Acetic acid                                        | 1.72         | 1.03           | 0.55                       | 2.12                       | 1.92          | 1.47         | 1.10           | 0.57                       | 2.02                       | 1.28          |
| Acetaldehyde                                       | 1.09         | 0.78           | 0.48                       | 1.38                       | 0.94          | 1.13         | 0.94           | 0.57                       | 1.49                       | 0.85          |
| Ethanol + Formic acid                              | 0.96         | 0.62           | 0.32                       | 1.18                       | 1.06          | 0.95         | 0.78           | 0.52                       | 1.23                       | 0.71          |
| MEK                                                | 0.58         | 0.42           | 0.26                       | 0.73                       | 0.53          | 0.55         | 0.45           | 0.26                       | 0.72                       | 0.47          |
| Butandione + MAA                                   | 0.21         | 0.14           | -0.12                      | 0.41                       | 0.45          | 0.33         | 0.28           | 0.08                       | 0.53                       | 0.37          |
| m75 – C <sub>3</sub> H <sub>6</sub> O <sub>2</sub> | 0.36         | 0.23           | 0.14                       | 0.44                       | 0.39          | 0.31         | 0.25           | 0.14                       | 0.41                       | 0.24          |
| Pinonaldehyde                                      | 0.40         | 0.34           | 0.17                       | 0.64                       | 0.44          | 0.17         | 0.08           | -0.01                      | 0.25                       | 0.41          |
| MVK+MACR                                           | 0.39         | 0.19           | 0.08                       | 0.44                       | 0.56          | 0.18         | 0.12           | 0.06                       | 0.21                       | 0.21          |
| Methylfuran + C <sub>6</sub> H <sub>10</sub>       | 0.21         | 0.14           | 0.09                       | 0.24                       | 0.22          | 0.31         | 0.25           | 0.14                       | 0.41                       | 0.17          |
| Furfural                                           | 0.21         | 0.13           | 0.07                       | 0.24                       | 0.26          | 0.19         | 0.12           | 0.06                       | 0.24                       | 0.21          |
| Furandione + furfuryl<br>alcohol                   | 0.18         | 0.12           | 0.08                       | 0.22                       | 0.15          | 0.14         | 0.12           | 0.07                       | 0.19                       | 0.11          |
| Formaldehyde proxy                                 | 0.15         | 0.12           | 0.04                       | 0.21                       | 0.16          | 0.12         | 0.12           | 0.04                       | 0.21                       | 0.15          |
| Nopinone                                           | 0.17         | 0.15           | 0.04                       | 0.28                       | 0.22          | 0.07         | 0.05           | 0.01                       | 0.12                       | 0.19          |
| Benzenediol                                        | 0.16         | 0.13           | 0.07                       | 0.21                       | 0.17          | 0.12         | 0.09           | 0.03                       | 0.18                       | 0.16          |
| Methylbutenone                                     | 0.10         | 0.07           | 0.04                       | 0.13                       | 0.10          | 0.10         | 0.08           | 0.04                       | 0.13                       | 0.09          |
| Toluene                                            | 0.65         | 0.39           | 0.22                       | 0.74                       | 0.77          | 0.69         | 0.48           | 0.27                       | 0.87                       | 0.65          |
| C <sub>8</sub> _Aromatics                          | 0.62         | 0.36           | 0.18                       | 0.72                       | 0.86          | 0.61         | 0.40           | 0.20                       | 0.79                       | 0.66          |
| Benzene                                            | 0.42         | 0.32           | 0.16                       | 0.53                       | 0.42          | 0.50         | 0.42           | 0.28                       | 0.65                       | 0.36          |
| C <sub>9</sub> _Aromatics                          | 0.62         | 0.36           | 0.18                       | 0.72                       | 0.49          | 0.46         | 0.31           | 0.18                       | 0.57                       | 0.55          |
| Isoprene + Furan                                   | 0.70         | 0.45           | 0.22                       | 0.85                       | 0.89          | 0.45         | 0.33           | 0.19                       | 0.55                       | 0.44          |
| C <sub>4</sub> H <sub>8</sub> + Propenal           | 0.60         | 0.43           | 0.27                       | 0.74                       | 0.57          | 0.81         | 0.60           | 0.33                       | 1.06                       | 0.84          |
| Monoterpenes                                       | 0.57         | 0.42           | 0.23                       | 0.75                       | 0.85          | 0.42         | 0.30           | 0.18                       | 0.50                       | 0.59          |
| Monoterpenes frag                                  | 0.18         | 0.14           | 0.10                       | 0.20                       | 0.22          | 0.20         | 0.15           | 0.11                       | 0.20                       | 0.21          |
| m46                                                | 1.00         | 0.34           | 0.05                       | 1.09                       | 1.94          | 0.94         | 0.38           | 0.08                       | 1.06                       | 1.45          |
| Trimethylamine                                     | 0.17         | 0.15           | 0.09                       | 0.21                       | 0.13          | 0.15         | 0.12           | 0.08                       | 0.19                       | 0.11          |
| Acetonitrile                                       | 0.14         | 0.13           | 0.09                       | 0.18                       | 0.08          | 0.16         | 0.13           | 0.09                       | 0.21                       | 0.12          |
| Allylamine                                         | 0.04         | 0.04           | 0.02                       | 0.05                       | 0.03          | 0.05         | 0.04           | 0.02                       | 0.06                       | 0.05          |
| DMS                                                | 0.04         | 0.04           | 0.00                       | 0.08                       | 0.07          | 0.06         | 0.06           | 0.03                       | 0.09                       | 0.06          |
| Dichlorobenzene                                    | 0.17         | 0.12           | 0.05                       | 0.31                       | 0.28          | 0.05         | 0.04           | -0.03                      | 0.12                       | 0.18          |
| TOTAL                                              | 19.11        | 14.52          | 8.46                       | 24.09                      | 15.91         | 17.65        | 14.49          | 9.33                       | 23.31                      | 12.71         |

**Table S4: Mean VOC concentrations ( $\mu\text{g}\cdot\text{m}^{-3}$ ) per cluster**

|                                                    | Continental | Anticyclonic | Oceanic_1 | Oceanic_2 | North_1 | North_2 |
|----------------------------------------------------|-------------|--------------|-----------|-----------|---------|---------|
| Formaldehyde proxy                                 | 0.22        | 0.18         | 0.04      | 0.09      | 0.18    | 0.11    |
| Methanol                                           | 6.21        | 5.41         | 2.23      | 2.74      | 4.31    | 2.31    |
| Acetonitrile                                       | 0.21        | 0.18         | 0.12      | 0.12      | 0.17    | 0.11    |
| Acetaldehyde                                       | 1.97        | 1.41         | 0.53      | 0.74      | 1.39    | 0.88    |
| mz_46                                              | 2.84        | 1.10         | 0.09      | 0.35      | 1.58    | 0.95    |
| Ethanol + Formic acid                              | 1.70        | 1.16         | 0.47      | 0.66      | 1.22    | 0.74    |
| C <sub>4</sub> H <sub>8</sub> + Propenal           | 0.97        | 0.86         | 0.44      | 0.49      | 0.94    | 0.62    |
| Allylamine                                         | 0.06        | 0.05         | 0.03      | 0.03      | 0.05    | 0.04    |
| Acetone                                            | 4.03        | 3.22         | 1.53      | 1.74      | 2.82    | 1.55    |
| Trimethylamine                                     | 0.25        | 0.22         | 0.11      | 0.11      | 0.18    | 0.11    |
| Acetic acid                                        | 3.17        | 2.11         | 0.64      | 0.99      | 1.98    | 1.24    |
| DMS                                                | 0.07        | 0.07         | 0.04      | 0.04      | 0.06    | 0.04    |
| Isoprene + Furan                                   | 0.81        | 0.88         | 0.41      | 0.42      | 0.58    | 0.32    |
| MVK + MACR                                         | 0.46        | 0.43         | 0.18      | 0.21      | 0.29    | 0.12    |
| MEK                                                | 0.97        | 0.75         | 0.30      | 0.37      | 0.71    | 0.45    |
| m75 – C <sub>3</sub> H <sub>6</sub> O <sub>2</sub> | 0.61        | 0.48         | 0.17      | 0.20      | 0.39    | 0.25    |
| Benzene                                            | 0.76        | 0.55         | 0.28      | 0.32      | 0.53    | 0.43    |
| Monoterpenes frag                                  | 0.23        | 0.25         | 0.14      | 0.14      | 0.23    | 0.14    |
| Methylfuran + C <sub>6</sub> H <sub>10</sub>       | 0.28        | 0.28         | 0.12      | 0.13      | 0.23    | 0.15    |
| Methylbutenone                                     | 0.14        | 0.14         | 0.06      | 0.07      | 0.12    | 0.09    |
| Butanedione + MAA                                  | 0.52        | 0.44         | -0.01     | 0.10      | 0.42    | 0.18    |
| Toluene                                            | 1.11        | 0.87         | 0.32      | 0.44      | 0.90    | 0.50    |
| Furfural                                           | 0.29        | 0.27         | 0.13      | 0.14      | 0.22    | 0.16    |
| Furandione + furfuryl alcohol                      | 0.24        | 0.21         | 0.10      | 0.11      | 0.18    | 0.14    |
| C8-Aromatics                                       | 1.06        | 0.82         | 0.27      | 0.39      | 0.85    | 0.47    |
| Benzenediol                                        | 0.21        | 0.19         | 0.09      | 0.11      | 0.18    | 0.13    |
| C9-Aromatics                                       | 0.63        | 0.53         | 0.24      | 0.30      | 0.64    | 0.38    |
| Monoterpenes                                       | 0.61        | 0.74         | 0.38      | 0.37      | 0.53    | 0.36    |
| Nopinone                                           | 0.20        | 0.19         | 0.10      | 0.07      | 0.11    | 0.12    |
| Dichlorobenzene                                    | 0.14        | 0.15         | 0.08      | 0.11      | 0.11    | 0.12    |
| Pinonaldehyde                                      | 0.38        | 0.36         | 0.24      | 0.26      | 0.26    | 0.32    |

**Table S5: Correlations of VOCs with external tracers in winter**

| TRAFFIC WINTERS | R <sup>2</sup> | WOOD BURNING WINTERS | R <sup>2</sup> | MONOTERPENES WINTERS | R <sup>2</sup> |
|-----------------|----------------|----------------------|----------------|----------------------|----------------|
| m93xBCff        | 0.73           | m83xBCwb             | 0.88           | m137xm97             | 0.231          |
| m107xBCff       | 0.80           | m85xBCwb             | 0.83           | m137xBCff            | 0.302          |
| m121xBCff       | 0.77           | m87xBCwb             | 0.53           | m137xNO2             | 0.234          |
| m93xNO2         | 0.65           | m97xBCwb             | 0.75           | m137xm93             | 0.404          |
| m107xNO2        | 0.64           | m99xBCwb             | 0.74           | m137xm107            | 0.374          |
| m121xNO2        | 0.61           | m111xBCwb            | 0.67           | m137xm121            | 0.24           |
| m93xm107        | 0.85           |                      |                | m81xm97              | 0.347          |
| m93xm121        | 0.64           |                      |                | m81xBCff             | 0.431          |
| m107xm121       | 0.58           |                      |                | m81xNO2              | 0.371          |
|                 |                |                      |                | m81xm93              | 0.593          |
|                 |                |                      |                | m81xm107             | 0.523          |
|                 |                |                      |                | m81xm121             | 0.530          |

105

110

115

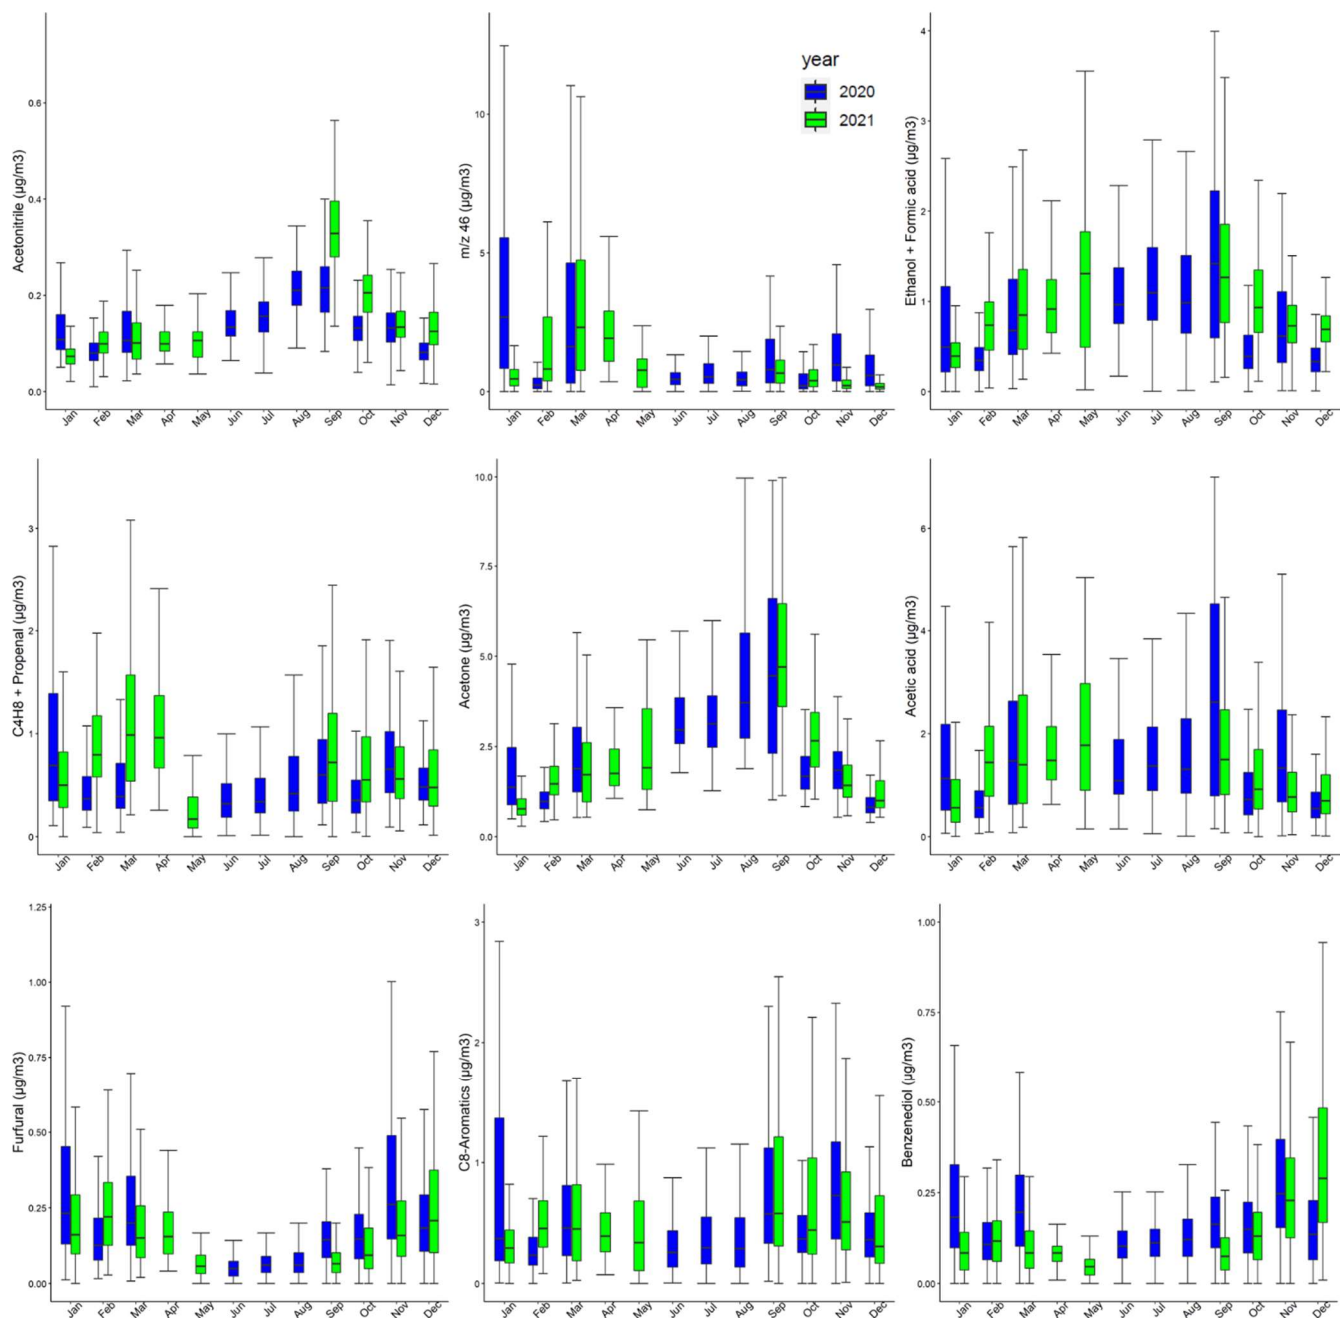

120

**Figure S1: Monthly distribution of Furfural (m/z 97) for 2020 (blue) and 2021 (green). Boxes represent 25th and 75th percentiles, the line is the median. Whiskers represent 5th and 95th percentiles**



## 125 References

- Aoki, N., Inomata, S., and Tanimoto, H.: Detection of C1–C5 alkyl nitrates by proton transfer reaction time-of-flight mass spectrometry, *International Journal of Mass Spectrometry*, 263, 12–21, <https://doi.org/10.1016/j.ijms.2006.11.018>, 2007.
- Borbon, A., Fontaine, H., Veillerot, M., Locoge, N., Galloo, J. C., and Guillermo, R.: An investigation into the traffic-related fraction of isoprene at an urban location, *Atmospheric Environment*, 35, 3749–3760, [https://doi.org/10.1016/S1352-2310\(01\)00170-4](https://doi.org/10.1016/S1352-2310(01)00170-4), 2001.
- 130
- Bruns, E. A., El Haddad, I., Slowik, J. G., Kilic, D., Klein, F., Baltensperger, U., and Prévôt, A. S. H.: Identification of significant precursor gases of secondary organic aerosols from residential wood combustion, *Sci Rep*, 6, 27881, <https://doi.org/10.1038/srep27881>, 2016.
- Bruns, E. A., Slowik, J. G., El Haddad, I., Kilic, D., Klein, F., Dommen, J., Temime-Roussel, B., Marchand, N., Baltensperger, U., and Prévôt, A. S. H.: Characterization of gas-phase organics using proton transfer reaction time-of-flight mass spectrometry: fresh and aged residential wood combustion emissions, *Atmos. Chem. Phys.*, 17, 705–720, <https://doi.org/10.5194/acp-17-705-2017>, 2017.
- 135
- Budisulistiorini, S. H., Canagaratna, M. R., Croteau, P. L., Marth, W. J., Baumann, K., Edgerton, E. S., Shaw, S. L., Knipping, E. M., Worsnop, D. R., Jayne, J. T., Gold, A., and Surratt, J. D.: Real-Time Continuous Characterization of Secondary Organic Aerosol Derived from Isoprene Epoxydiols in Downtown Atlanta, Georgia, Using the Aerodyne Aerosol Chemical Speciation Monitor, *Environ. Sci. Technol.*, 47, 5686–5694, <https://doi.org/10.1021/es400023n>, 2013.
- 140
- Duncanianu, M., David, M., Kartigeyane, S., Cirtog, M., Doussin, J.-F., and Picquet-Varrault, B.: Measurement of alkyl and multifunctional organic nitrates by proton-transfer-reaction mass spectrometry, *Atmos. Meas. Tech.*, 10, 1445–1463, <https://doi.org/10.5194/amt-10-1445-2017>, 2017.
- 145
- de Gouw, J. and Warneke, C.: Measurements of volatile organic compounds in the earth’s atmosphere using proton-transfer-reaction mass spectrometry, *Mass Spectrom. Rev.*, 26, 223–257, <https://doi.org/10.1002/mas.20119>, 2007.
- Gueneron, M., Erickson, M. H., VanderSchelden, G. S., and Jobson, B. T.: PTR-MS fragmentation patterns of gasoline hydrocarbons, *International Journal of Mass Spectrometry*, 379, 97–109, <https://doi.org/10.1016/j.ijms.2015.01.001>, 2015.
- Holzinger, R., Lee, A., Paw U, K T, and Goldstein, A. H.: Observations of oxidation products above a forest imply biogenic emissions of very reactive compounds, *Atmos. Chem. Phys.*, 9, 2005.
- 150
- Kammer, J., Décuq, C., Baisnée, D., Ciuraru, R., Lafouge, F., Buysse, P., Bsaibes, S., Henderson, B., Cristescu, S. M., Benabdallah, R., Chandra, V., Durand, B., Fanucci, O., Petit, J.-E., Truong, F., Bonnaire, N., Sarda-Estève, R., Gros, V., and Loubet, B.: Characterization of particulate and gaseous pollutants from a French dairy and sheep farm, *Science of The Total Environment*, 135598, <https://doi.org/10.1016/j.scitotenv.2019.135598>, 2019.
- 155
- Kim, S., Karl, T., Guenther, A., Tyndall, G., Orlando, J., Harley, P., Rasmussen, R., and Apel, E.: Emissions and ambient distributions of Biogenic Volatile Organic Compounds (BVOC) in a ponderosa pine ecosystem: interpretation of PTR-MS mass spectra, *Atmos. Chem. Phys.*, 13, 2010.
- 160
- Knighton, W. B., Herndon, S. C., Shorter, J. H., Miake-Lye, R. C., Zahniser, M. S., Akiyama, K., Shimono, A., Kitasaka, K., Shimajiri, H., and Sugihara, K.: Laboratory Evaluation of an Aldehyde Scrubber System Specifically for the Detection of Acrolein, *Journal of the Air & Waste Management Association*, 57, 1370–1378, <https://doi.org/10.3155/1047-3289.57.11.1370>, 2007.

- Kroll, J. H., Ng, N. L., Murphy, S. M., Flagan, R. C., and Seinfeld, J. H.: Secondary Organic Aerosol Formation from Isoprene Photooxidation, *Environ. Sci. Technol.*, 40, 1869–1877, <https://doi.org/10.1021/es0524301>, 2006.
- 165 Languille, B., Gros, V., Petit, J.-E., Honoré, C., Baudic, A., Perrussel, O., Foret, G., Michoud, V., Truong, F., Bonnaire, N., Sarda-Estève, R., Delmotte, M., Feron, A., Maisonneuve, F., Gaimoz, C., Formenti, P., Kotthaus, S., Haeffelin, M., and Favez, O.: Wood burning: A major source of Volatile Organic Compounds during wintertime in the Paris region, *Science of The Total Environment*, 711, 135055, <https://doi.org/10.1016/j.scitotenv.2019.135055>, 2020.
- Lindinger, W., Jordan, A., and Hansel, A.: Proton-transfer-reaction mass spectrometry (PTR-MS): on-line monitoring of volatile organic compounds at pptv levels, *Chem. Soc. Rev.*, 27, 347, <https://doi.org/10.1039/a827347z>, 1998.
- 170 Lipari, Frank., Dasch, J. M., and Scruggs, W. F.: Aldehyde emissions from wood-burning fireplaces, *Environ. Sci. Technol.*, 18, 326–330, <https://doi.org/10.1021/es00123a007>, 1984.
- Panopoulou, A.: Yearlong measurements of monoterpenes and isoprene in a Mediterranean city (Athens): Natural vs anthropogenic origin, *Atmospheric Environment*, 12, 2020.
- 175 Panopoulou, A., Liakakou, E., Sauvage, S., Gros, V., Locoge, N., Stavroulas, I., Bonsang, B., Gerasopoulos, E., and Mihalopoulos, N.: Yearlong measurements of monoterpenes and isoprene in a Mediterranean city (Athens): Natural vs anthropogenic origin, *Atmospheric Environment*, 243, 117803, <https://doi.org/10.1016/j.atmosenv.2020.117803>, 2020.
- Španěl, P., Wang, T., and Smith, D.: A selected ion flow tube, SIFT, study of the reactions of H<sub>3</sub>O<sup>+</sup>, NO<sup>+</sup> and O<sub>2</sub><sup>+</sup> ions with a series of diols, *International Journal of Mass Spectrometry*, 218, 227–236, [https://doi.org/10.1016/S1387-3806\(02\)00724-8](https://doi.org/10.1016/S1387-3806(02)00724-8), 2002.
- 180 Stockwell, C. E., Veres, P. R., Williams, J., and Yokelson, R. J.: Characterization of biomass burning emissions from cooking fires, peat, crop residue, and other fuels with high-resolution proton-transfer-reaction time-of-flight mass spectrometry, *Atmos. Chem. Phys.*, 15, 845–865, <https://doi.org/10.5194/acp-15-845-2015>, 2015.
- 185 Surratt, J. D., Chan, A. W. H., Eddingsaas, N. C., Chan, M., Loza, C. L., Kwan, A. J., Hersey, S. P., Flagan, R. C., Wennberg, P. O., and Seinfeld, J. H.: Reactive intermediates revealed in secondary organic aerosol formation from isoprene, *Proceedings of the National Academy of Sciences*, 107, 6640–6645, <https://doi.org/10.1073/pnas.091114107>, 2010.
- Taipale, R., Ruuskanen, T. M., Rinne, J., Kajos, M. K., Hakola, H., Pohja, T., and Kulmala, M.: Technical Note: Quantitative long-term measurements of VOC concentrations by PTR-MS – measurement, calibration, and volume mixing ratio calculation methods, *Atmos. Chem. Phys.*, 18, 2008.
- 190 Wagner, P. and Kuttler, W.: Biogenic and anthropogenic isoprene in the near-surface urban atmosphere — A case study in Essen, Germany, *Science of The Total Environment*, 475, 104–115, <https://doi.org/10.1016/j.scitotenv.2013.12.026>, 2014.
- Williams, J., Pöschl, U., Crutzen, P. J., Hansel, A., Holzinger, R., Warneke, C., Lindinger, W., and Lelieveld, J.: An Atmospheric Chemistry Interpretation of Mass Scans Obtained from a Proton Transfer Mass Spectrometer Flown over the Tropical Rainforest of Surinam, 34, n.d.
- 195 Yuan, B., Coggon, M. M., Koss, A. R., Warneke, C., Eilerman, S., Peischl, J., Aikin, K. C., Ryerson, T. B., and de Gouw, J. A.: Emissions of volatile organic compounds (VOCs) from concentrated animal feeding operations (CAFOs): chemical compositions and separation of sources, *Atmos. Chem. Phys.*, 17, 4945–4956, <https://doi.org/10.5194/acp-17-4945-2017>, 2017a.

Yuan, B., Koss, A. R., Warneke, C., Coggon, M., and Sekimoto, K.: Proton-Transfer-Reaction Mass Spectrometry: Applications in Atmospheric Sciences, *Chem. Rev.*, 43, 2017b.

200 Zhao, J. and Zhang, R.: Proton transfer reaction rate constants between hydronium ion ( $\text{H}_3\text{O}^+$ ) and volatile organic compounds, *Atmospheric Environment*, 38, 2177–2185, <https://doi.org/10.1016/j.atmosenv.2004.01.019>, 2004.
