# Supplementary material for: Two years of Volatile Organic Compounds online in-situ measurements at SIRTA (Paris region, France) using Proton-Transfer-Reaction Mass Spectrometry
Source: Copernicus journal article supplement (doi:10.5194/essd-2022-406), 2022-12-05
Supplement: Supplementary file [file essd-2022-406-AC2-supplement.pdf]

## **Response to the reviewers' comments on essd-2022-406 "Two years of Volatile Organic Compounds online in-situ measurements at SIRTa (Paris region, France) using Proton-Transfer-Reaction Mass Spectrometry"**

We thank the reviewer for all the constructive comments. In the following, we provide the response to the reviewer using black for original review comments, green for authors' responses, and *blue italic for changes in the revised version*.

*Please note that lines number correspond here to the lines in the preprint and not in the revised version.*

*The original figures/tables are indicated with their original reference in this document, while the additional figures/tables are referenced here as "Figure/Table R" with a number and their respective reference in the revised paper are indicated in brackets. Example: Table R1 (Table S3 in the revised paper)*

*For clarity, comments have been numbered.*

### **General comment**

This work shows a two year long PTRMS data set in SIRTa, and it is very valuable to the community, particularly modelling community, as it captures COVID 19 lock down as well as other very interesting and contrasting atmospheric chemistry periods. I think it is well written and the paper should be published, but, much more information needs to be provided on data methodology and analysis. Therefore I suggest major revisions mostly on methodological process.

We thank the reviewer for the valuable comments, which are addressed one by one hereafter.

## Specific comments

48) 2.1.2. I would remove this section or put it later as this is not your main objective and the data is only for comparison purposes.

Taking into account the reviewer's suggestion, we have deleted the section 2.1.2

49) I also do not see information on temperature, pressure and par measurements which you use for concentration calculations and show it on graphs. I need info on sensors and methodology.

We have added a short description of these additional instruments (including meteorological sensors) in the site description. In consequence, 2.1 is modified as (additions are in bold):

### *“2.1 Site presentation*

*The SIRTA (Site Instrumental de Recherche par Télédétection Atmosphérique) observation platform is located 20 km southwest of Paris (France) and is considered as representative of suburban background conditions in the Paris region (Haeffelin et al., 2005; Sciare et al., 2011). It is one of the main ACTRIS national facilities in France. It is composed of a main site (48.718°N, 2.208°E, 156 m above sea level), for monitoring atmospheric meteorological parameters, as well as for aerosols and clouds remote sensing. Dedicated in-situ observations of aerosols and reactive gases are conducted at the Laboratoire des Sciences du Climat et de l'Environnement (LSCE, 48.709° N, 2.159° E, 162 m above sea level), 4 km away from the main SIRTA site.*

*At the main site, the ambient temperature is measured by a thermometer with a Platinum resistance (PT-100) and the relative humidity is measured by an HMP 110 hygrometer, both at 2 meter high and at a native temporal resolution of 5 seconds (Haeffelin et al., 2005; Chiriaco et al., 2018). The mixed layer height is measured by automatic lidar and ceilometer and derived using the CABAM (Characterising the Atmospheric Boundary layer based on ALC Measurements) algorithm (Kotthaus and Grimmond, 2018).*

*At SIRTA-LSCE, major submicron aerosol chemical species, i.e organic matter (OM), nitrate, sulfate, ammonium, and chloride, have been measured using a quadrupole Aerosol Chemical Speciation Monitor (Q-ACSM) since 2011 (Petit et al, 2015; Zhang et al, 2019). complementary information on equivalent black carbon (eBC) concentrations and sources is provided by collocated multiwavelength Aethalometer AE33 (Magee Scientific; Petit et al., 2015; Zhang et al., 2019). Therefore, eBC could be discriminated between its two main combustion sources, i.e. fossil-fuel (BC<sub>ff</sub>) and wood burning emissions (BC<sub>wb</sub>), using the Aethalometer model (Sandradewi et al., 2008; Favez et al., 2010; Sciare et al., 2011; Drinovec et al., 2015). For these calculations, the absorption Angström exponent values used, in the wavelength range of 470-950 nm, were 0.9 and 1.85 for BC<sub>ff</sub> and BC<sub>wb</sub> respectively, based on Petit et al. (2021). Nitrogen monoxide and dioxide (resp. NO and NO<sub>2</sub>) have been monitored since 2012 using chemiluminescence NO<sub>2</sub>/NO/NO<sub>x</sub> analyzer (model T200UP, Teledyne API, USA). More information on these additional gas and particulate measurements are given in Petit et al. (2021).*

*The Paris region is quite densely populated, local residential areas are situated mainly north and east of the station. Highways with important traffic (A6, A10) connect Paris to other cities*

*and pass through the east and south of the station, a national road with important traffic (N118) passes to the east. Forests, agricultural and natural areas are located on the west and south of SIRT A, and marine air masses from the Atlantic Ocean can reach the Paris region (Crippa et al., 2013). The station is therefore under different plumes depending on the wind direction, i.e. under regional background and oceanic air masses if the wind comes from the west/southwest, or under Paris and continental plumes if the wind comes from the north/northeast (see Figure 1). In 2020 and 2021, SIRT A was respectively 50% and 36% of the time under oceanic (SW) and continental (NE) plumes.*

*Throughout this manuscript, results are shown in universal time (UTC), while local time corresponds to CET (UTC+1) from November to March and to CEST (UTC+2) from April to October.”*

### 2.3.1.

50) Line 126: Please state the period of PTRMS measurements

*This sentence is rephrased as: “With the aim of characterizing VOC levels on a real-time and long-term basis, a Proton-Transfer-Reaction Quadrupole Mass Spectrometer (PTR-Q-MS, Ionicon Analytik, 2010) has been implemented for continuous measurements at SIRT A from January 17<sup>th</sup>, 2020 onwards.”*

51) Line 134: from where do you get the clean air, how clean is this?

*Here, this is a general description, the specificities for the PTR-MS at SIRT A are provided later on. In our setup, the clean air obtained from a GCU equipped with a catalytic VOC scrubber made of Pt/Pd and heated at 350°C.*

*A sentence is added in the general description: “These blanks are usually done by passing clean air through the inlet line and conducted ideally every few hours and at least once a day. The clean air is either zero air from a bottle or ambient air that passes through a device which gets rid of the VOC using a scrubber or a catalyzer.”*

*Moreover, the description of our blank system is completed as:*

*l. 170: “A Gas Calibration Unit (GCU, IONICON, Austria), equipped with a catalytic VOC scrubber made of Pt/Pd and heated at 350°C, was used for 1-hour blanks every 13 hours 170 and for regular calibrations, about once a month: a VOC standard mixture was injected through the dilution system inside the GCU to perform steps at different volume mixing ratios (VMR, ranging from 1 to 20 ppb).”*

52) Lines 137-139: the transmission calculation needs to be better explained. How is the transmission curve? How did you calculate it? How often did you calculate it? How do you interpolate transmission curves over time? Please state k rates for each compound. Why 3 instead of 2 for unknown k rates? Can you provide a reference for this? Which standards you use for transmission, how did you take into account fragmentation of compounds. But to me the most

critical thing is to see if you have calculated several transmission curves or only one (the latter would not be correct then).

The transmission curve was calculated based on the formula from Taipale et al (2008), presented in the supplementary material (Eq S1), using the measured sensitivities, the instrument parameters and the proton transfer reaction rates (now presented in updated Table 1). This transmission is calculated after each calibration, and the obtained coefficients are linearly interpolated to retrieve the sensitivities of the compounds not present in the standards. For unknown compound or rate, a reference of  $3 \cdot 10^{-9} \text{ cm}^3 \cdot \text{s}^{-1} \cdot \text{molecule}^{-1}$  is used, as usually recommended, because most proton transfer reaction constants range  $2\text{-}4 \cdot 10^{-9} \text{ cm}^3 \cdot \text{s}^{-1} \cdot \text{molecule}^{-1}$  (ACTRIS guidelines; Holzinger et al, 2015). The standards used for the transmission are the same than for the calibration (because the calibration coefficients are used to calculate the transmission). The compounds that fragment (e.g., isoprene, monoterpenes) are not included for the transmission calculation.

Indeed, several transmission curves were calculated over the 2-year period, two examples of consecutive curves are given in Figure R1 (Figure S2 in the paper).

In Section 2.3.4., the following paragraph is added: *“After each calibration, the transmission is calculated for some of the calibrated compounds (methanol, acetonitrile, acetaldehyde, propenal, benzene, toluene, C8-aromatics, C9-aromatics, dichlorobenzene and trichlorobenzene, when available) using their measured sensitivities (Eq. S1). As an example, two consecutive transmission curves are presented on Figure S2, for 1<sup>st</sup> July 2020 and 7<sup>th</sup> August 2020. The transmission coefficients are interpolated linearly over time. The same standards are used for the transmission than the calibration, since we use the measured sensitivities to calculate the transmission. The compounds which could fragment are not included in the calculation of the transmission curve (e.g., isoprene, monoterpenes).”*

In the Text S1, the following part is updated (changes are indicated in bold): *“To obtain the sensitivity (in ncps/ppb) of compounds not present in the calibration standard, first the transmission of compounds present in the standard is calculated, based on the instrument’s parameters and following Equation S1 (Taipale et al., 2008):*

$$\frac{T_{RH^+}}{T_{H_3O^+}} = 10^9 \frac{p_{drift}}{I_{norm} p_{norm}} \frac{\mu_0 N_0}{kL} \frac{E}{N^2} S_{norm}$$

*With  $p_{drift}$  being the drift pressure,  $I_{norm}$  the normalized intensity (equal to  $10^6$ ),  $p_{norm}$  the normal pressure,  $\mu_0$  being the reduced ion mobility of the primary ions and equal to  $2.8 \text{ cm}^2 \cdot \text{V}^{-1} \cdot \text{s}^{-1}$ ,  $N_0$  the number density of air standard conditions,  **$k$  being the reaction rate constant of the given compound**,  $L$  the length of the drift tube,  $E = U_{drift}/L$ ,  $N = N_A p_{drift}/(RT_{drift})$ , and  $S_{norm}$  the normalized sensitivity obtained by a standard calibration.*

*The  $k$  rates used in this study are summarized in Table 1; for unknown compounds or rates, a value of  $3 \cdot 10^{-9} \text{ cm}^3 \cdot \text{s}^{-1} \cdot \text{molecule}^{-1}$  is used, as usually recommended, because most proton transfer reaction constants range  $2\text{-}4 \cdot 10^{-9} \text{ cm}^3 \cdot \text{s}^{-1} \cdot \text{molecule}^{-1}$  (ACTRIS guidelines; Holzinger, 2015).”*

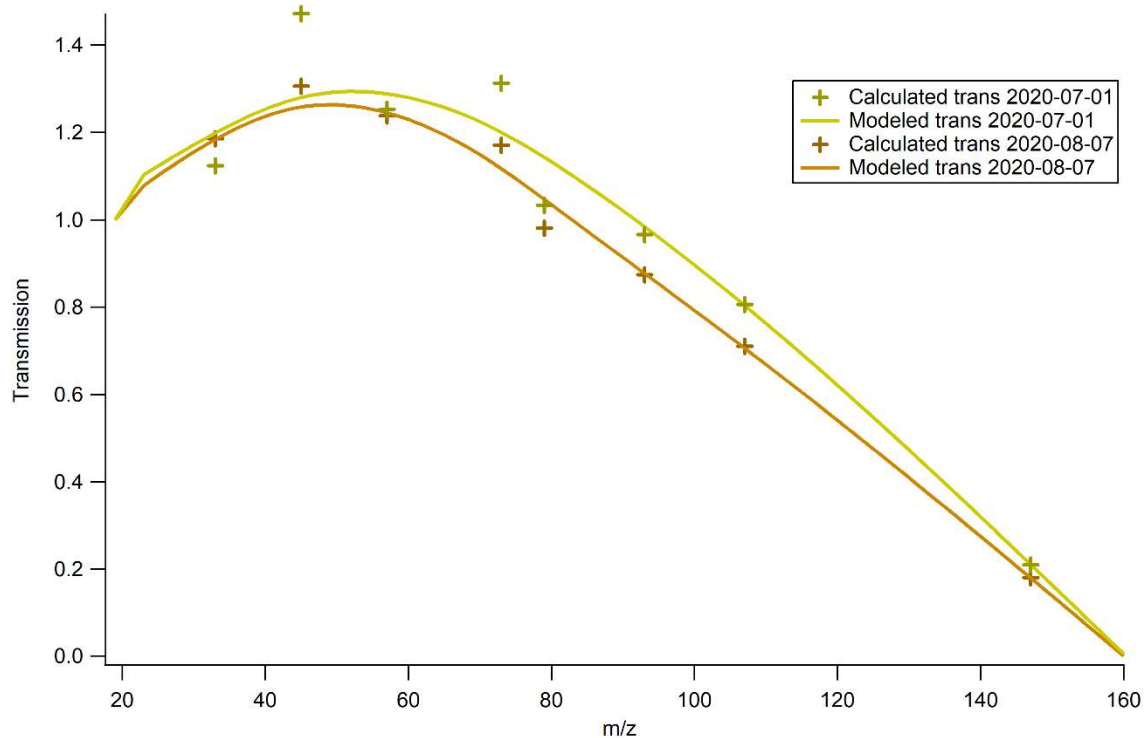

Figure R1: Examples of transmission curves plotted by interpolation of calculated transmissions from the calibrations of 7/1/2020 and 8/7/2020.

53) 2.3. I need a longer explanation on inlet set up. How it is? A picture would be very explanatory. Is the line isolated? How are you heating the line? How tall is the SIRTA station, because 6 m for 15 m above ground is confusing. What is the OD and ID of the PFA lines. How this may be affecting compounds such as dichlorobenzene for stickiness? What is a Valco valve? Explain more on what is this and which material is done, how many connections you have.. etc..

Figure R2 (Figure S1 in the paper) presents the experimental set-up for the PTR-Q-MS measurements at SIRTA. This figure is added in the supplement. The line is isolated and heated using heating wires around the line and with a thermocouple monitoring the temperature. The instrument is located on the second (and last) floor of the building, therefore the line is just connected to the roof. The inner diameter is 9.53 mm, and an outer diameter is 12.7 mm (1/2 inch). This additional information on the line has been added in the text (see below). Although the line was passivated 3 days at the beginning of the measurements, we cannot rule out that some sticky compounds like dichlorobenzene can be affected. We note that this compound (which is not a focus in this study) is associated to a quite large error (43%).

The Section 2.3.1 is completed as: “The PTR-Q-MS is located on the second and last floor of the building, therefore the sampling line is directly connected to the roof and samples at about 15 m above ground level. The experimental set-up is shown on Figure S1. The sampling line has a total length of 6 metres, with an inner diameter of 9.53 mm, and an outer diameter of 12.7 mm

(1/2 inch). A pump provides a flow of about 8 L·min<sup>-1</sup>, thus ensuring a residence time for the air in the tube of about 3 seconds. The sampling line is made of PFA (perfluoroalkoxy). It is isolated and heated with heating wires around the line and with a thermocouple monitoring the temperature at 50°C to avoid condensation. Such a material needs to be passivated at the beginning of the measurement and therefore the first 3 days of measurements were not taken into account. A multiway valve (VALCO, Interchim, France) in stainless steel connects ambient air, blank and standard measurements to the PTR-MS inlet, therefore allowing to automatically switch between them.”

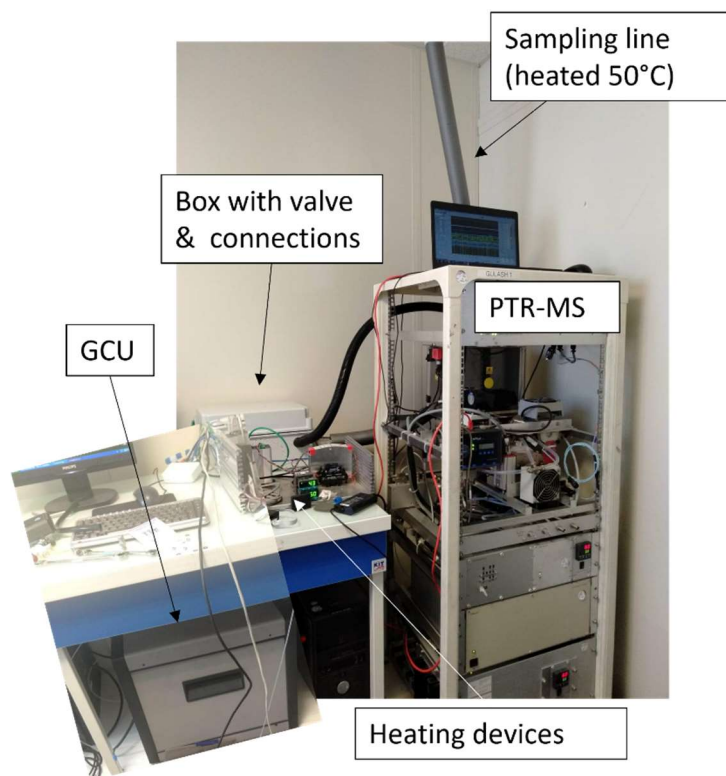

Figure R2: Experimental set-up of the PTR-MS for long-term VOC measurements at SIRTA.

### 2.3.2.

54) You say  $t_{drift}$  is 60°C in the text but it says 40°C in table S1

Corrected in the Table S1:

Table S1: Instrument parameters throughout the two-year measurement period

| Name                          | Symbol      | Value (unit) |
|-------------------------------|-------------|--------------|
| Pressure in the drift chamber | $P_{drift}$ | 2.2 mbar     |

|                                  |                          |                                     |
|----------------------------------|--------------------------|-------------------------------------|
| Pressure in the detector         | $P_{\text{detect}}$      | $1.7\text{-}3.3 \cdot 10^{-5}$ mbar |
| Controlled pressure              | $P_{\text{control}}$     | 352-484 mbar                        |
| Temperature in the drift chamber | $T_{\text{drift}}$       | 60 °C                               |
| Temperature in the inlet tube    | $T_{\text{inlet}}$       | 60 °C                               |
| Voltage in the drift chamber     | $U_{\text{drift}}$       | 600 V                               |
| Water flow                       | $F_{\text{H}_2\text{O}}$ | 5–8 mL·min <sup>-1</sup>            |
| Voltage                          | $U_{\text{SO}}$          | 90–130 V                            |
| Voltage                          | $U_{\text{S}}$           | 80–120 V                            |
| Source intensity                 | $I_{\text{hc}}$          | 3–6 mA                              |
| Voltage in the SEM               | $U_{\text{SEM}}$         | 2000–3500 V                         |
| Drift tube length                | $L$                      | 9.2 cm                              |
| Collision energy                 | $E/N$                    | 134.4 Td                            |

55) What do you mean by regularly adjusted.... How is this done, how often, do you calibrate for each change? You need to state better how calibrations are done, but we will get there.

These parameters (water flow, ion source current, voltages at the entrance and exit of the drift chamber and detector voltage) are typically adjusted after a maintenance, to have optimized values for the diagnostic  $m/z$  (i.e.,  $m/z$  30, 32, and 37). The detector voltage is increased if the sensitivity decreases and it is not due to the ion source. Yes, we calibrate after each change in the parameters.

This is clarified in the text: *“Other parameters such as water flow, ion source current, voltages at the entrance and exit of the drift chamber and detector voltage are adjusted when needed in order to maintain the instrument functioning in an optimized way (See Table S1). For example, if the sensitivity decreases and it is not due to the ion source, the detector voltage is increased; also after a maintenance the drift chamber voltages can be adjusted to keep the amount of  $m/z$  30, 32 and 37 low. A calibration is performed after changes in the parameters.”*

2.3.3.

56) Did you have equal dwell time for all compounds? It is not the same to measure acetone and sesquiterpenes for instance, and a dwell time of 10 s for compounds such as acetone, seems too long... although not necessarily wrong. But let me get this straight, you only get a value per compounds every 15 minutes?

This may decrease the power of online measurements... but again not necessarily wrong. I understand calibrations were done with the exact dwell time of measurements, right?

How this lower sensitivity with 5 s has been observed? Can you explain in time when changes were done? Also can you show this decrease in sensitivity?

Also can you explain why a resolution of 15m is better than 22m?

For the sake of simplicity, all compounds have the same dwell time (5 s from January to November 2020; then 10 s) except for diagnostic  $m/z$  (21, 25, 30, 32, 37, 55) which have a lower dwell time (100 ms). This results in a resolution time of 2.6 min for 5 seconds per  $m/z$  and 5.2 min for 10 seconds per  $m/z$  (see lines 166-168). (Please note that sesquiterpenes are not measured here.) The dwell times during the calibrations were not necessarily the same as for the ambient measurements, but since during the calibration it is sampled for a long time, it should not be an issue.

Figure R3 shows the signal in November and December 2020, the dwell time was changed on December 4<sup>th</sup> from 5s to 10s, which resulted in a less noisy signal. “sensitivity” was not the right word, sorry about that.

We preferred to have a time resolution lower than 15 min (at first 2.6 min then 5.2 min) to be able to study specific events at a high time resolution.

In the main text, it is rephrased as:

1. 156-158: *“Throughout the measurement period, it was observed that a dwell time of five seconds per mass can result in noisy signals, and so a dwell time of ten seconds was preferred, which would result in a resolution time of 22 minutes.”*

1. 166-168: *“The dwell time of the first six  $m/z$  is set to 100 ms, while the dwell time of all the other  $m/z$  was 5 seconds from January to November 2020, on December 4<sup>th</sup> it was increased to 10 seconds, resulting in a time resolution respectively of 2.6 min from January to November 2020 and 5.2 min from December 2020 on.”*



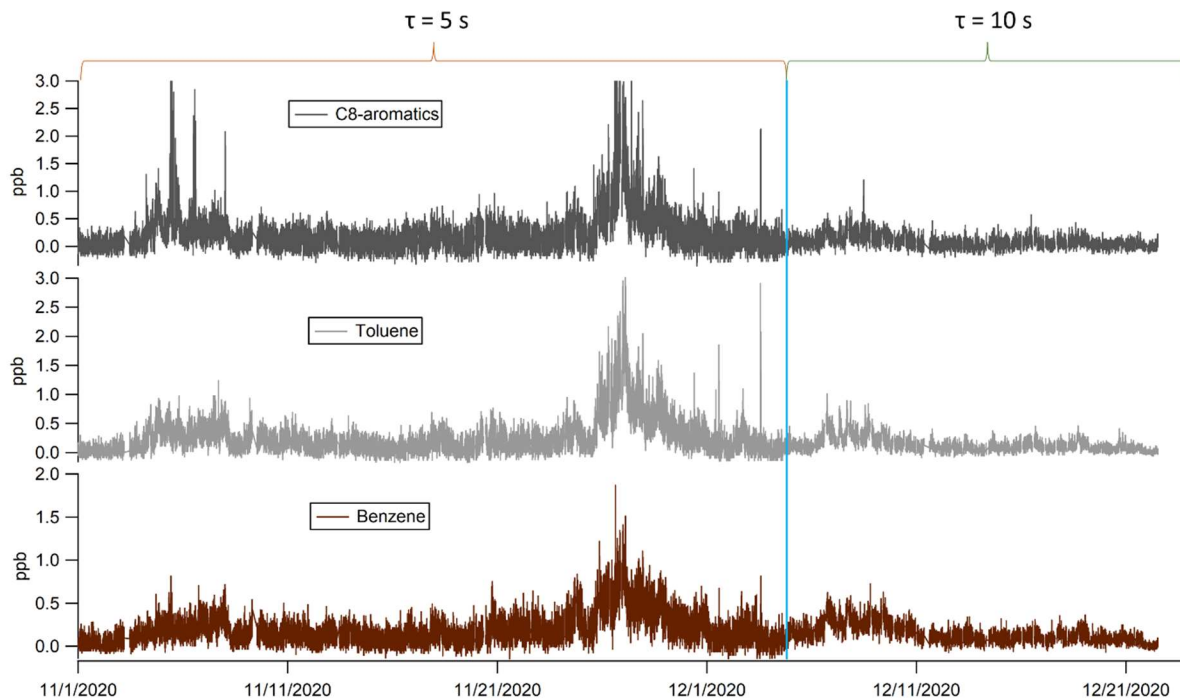

Figure R3: Temporal variability of C8-aromatics, toluene, and benzene in November and December 2020. The blue bar represents the change in the dwell time on December 4<sup>th</sup>.

57) Line 160: Can you show your scan mode measurements? Which previous studies you used?

Figure R4 shows the mass spectra of mean cps obtained over 5 days of scan mode measurements (from 1/10/2020 to 1/15/2020). The previous studies used are reviews of PTR-MS (de Gouw and Warneke, 2007; Blake et al., 2009; Yuan et al., 2017b) and studies on campaigns in the Paris region (Kammer et al, 2019; and Languille et al, 2020).

This part is rephrased:

*“Mass-to-charge ratios were selected based on previous studies: reviews of PTR-MS measurements (de Gouw and Warneke, 2007; Blake et al., 2009; Yuan et al., 2017b), a winter campaign that highlighted markers for the traffic and wood burning source (Languille et al, 2020), and a study on agricultural emissions (Kammer et al, 2019). The scan mode was run for a couple of days before starting the long-term measurements to confirm the selection.”*

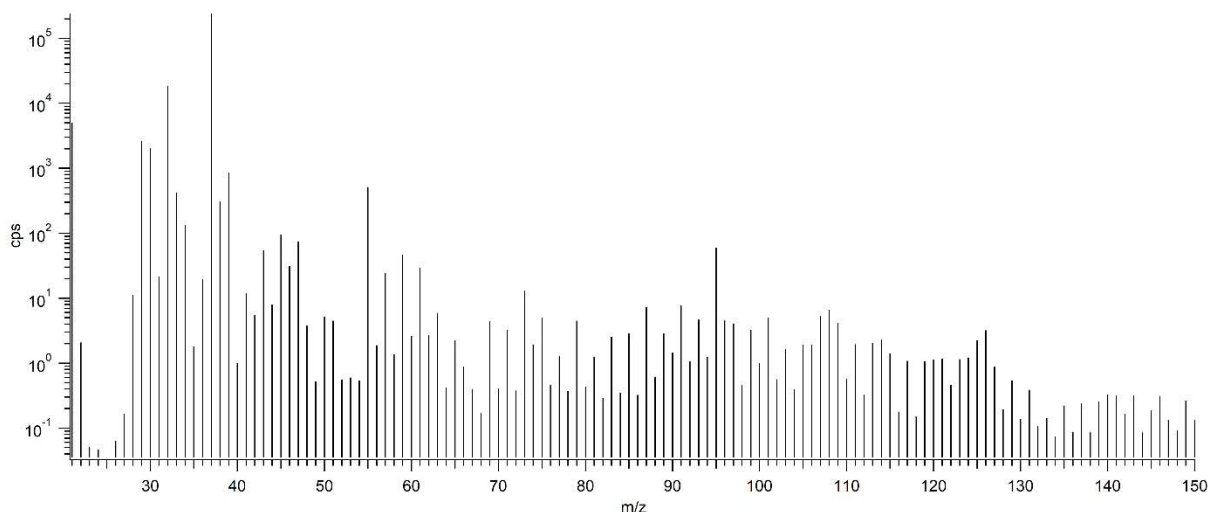

Figure R1: Scan mode measurements from 1/10/2020 to 1/15/2020

58) Line 166-168: This lines seem to contradict what you say in 156-159. Please rephrase and make it consistent.

It is rephrased as: “This resulted in 37 mass-to-charge ratios measured, the first 6 being for instrumental diagnostic purposes: *m/z* 21, 25, 30, 32, 37, 55, 31, 33, 42, 45, 46, 47, 57, 58, 59, 60, 61, 63, 69, 71, 73, 75, 79, 81, 83, 85, 87, 93, 97, 99, 107, 111, 121, 137, 139, 147, 151. The dwell time of the first six *m/z* is set to 100 ms, while the dwell time of all the other *m/z* was 5 seconds from January to November 2020, on December 4<sup>th</sup> it was increased to 10 seconds, resulting in a time resolution respectively of 2.6 min from January to November 2020 and 5.2 min from December 2020 on.”

59) I suggest including a table with all monitored masses, compound assignment, possible fragmentation, k rates, calibration factors, LOD and uncertainty..... (basically an updated table 1)

Thank you for this suggestion, Table 1 is updated as follows.

Table 1: List of mass-to-charge ratios measured, their corresponding name in this paper, possible fragmentation (Pagonis et al, 2019), reaction rate constants (Holzinger et al, 2019; Zhao and Zhang, 2004; Španěl et al., 1998 and 2002; Lindinger et al., 1998), mean and standard deviation of measured sensitivities, mean detection limit (LOD) and mean uncertainty. Compounds in bold are the ones that underwent the quality control of ACTRIS.

| m/z          | Compound(s)           | Fragmentation | k rate<br>( $10^{-9} \text{ cm}^3 \cdot \text{s}^{-1}$ ) | Mean calib factor (+/- sd)<br>(ncps/ppb) | Mean LOD<br>(ppt) | Mean error<br>(%) |
|--------------|-----------------------|---------------|----------------------------------------------------------|------------------------------------------|-------------------|-------------------|
| mz_31        | Formaldehyde proxy    |               | 3.00                                                     |                                          | 58                | 37                |
| <b>mz_33</b> | <b>Methanol</b>       |               | 2.20                                                     | 9 (+/- 2)                                | 221               | 16                |
| <b>mz_42</b> | <b>Acetonitrile</b>   |               | 4.74                                                     | 17 (+/- 4)                               | 9                 | 16                |
| <b>mz_45</b> | <b>Acetaldehyde</b>   |               | 3.03                                                     | 16 (+/- 4)                               | 47                | 18                |
| mz_46        | m46                   |               | 2.10                                                     |                                          | 54                | 33                |
| mz_47        | Ethanol + Formic acid |               | 2.26                                                     |                                          | 67                | 33                |

|               |                                |                |      |             |    |    |
|---------------|--------------------------------|----------------|------|-------------|----|----|
| <b>mz_57</b>  | <b>C4H8 + Propenal</b>         |                | 4.20 | 13 (+/- 5)  | 23 | 20 |
| mz_58         | Allylamine                     |                | 3    |             | 6  | 69 |
| <b>mz_59</b>  | <b>Acetone</b>                 |                | 3.25 | 18 (+/- 5)  | 17 | 14 |
| mz_60         | Trimethylamine                 | m/z 58 10%     | 2.40 |             | 11 | 34 |
| mz_61         | Acetic acid                    | m/z 43 40%     | 3.00 |             | 34 | 31 |
| mz_63         | DMS                            |                | 3    |             | 20 | 41 |
| <b>mz_69</b>  | <b>Isoprene + Furan</b>        | m/z 41 10%     | 1.85 | 5 (+/- 2)   | 37 | 21 |
| <b>mz_71</b>  | <b>MVK + MACR</b>              |                | 2.72 | 17 (+/- 3)  | 10 | 25 |
| <b>mz_73</b>  | <b>MEK</b>                     |                | 3.25 | 14 (+/- 5)  | 14 | 19 |
| mz_75         | C3H6O2                         |                | 2.80 |             | 16 | 33 |
| <b>mz_79</b>  | <b>Benzene</b>                 |                | 1.97 | 7 (+/- 2)   | 21 | 19 |
| mz_81         | MT's fragments                 |                | 2.04 |             | 8  | 33 |
| mz_83         | Methylfuran + C6H10            |                | 3    |             | 10 | 67 |
| mz_85         | Methylbutenone                 |                | 4.60 |             | 9  | 36 |
| mz_87         | Butanedione + Methacrylic acid |                | 1.85 |             | 40 | 36 |
| <b>mz_93</b>  | <b>Toluene</b>                 |                | 2.12 | 6 (+/- 3)   | 24 | 20 |
| mz_97         | Furfural                       |                | 3.90 |             | 11 | 35 |
| mz_99         | Furandione + Furfuryl alcohol  |                | 4.20 |             | 14 | 36 |
| <b>mz_107</b> | <b>C8-aromatics</b>            | m/z 79 < 10%   | 2.31 | 5 (+/- 3)   | 36 | 23 |
| mz_111        | Benzenediol                    |                | 2.70 |             | 30 | 42 |
| mz_121        | C9-aromatics                   | m/z 93 < 10%   | 2.40 |             | 31 | 31 |
| <b>mz_137</b> | <b>Monoterpenes</b>            | m/z 81 35%     | 2.04 | 1 (+/- 0.5) | 37 | 34 |
| mz_139        | Nopinone                       | <i>unknown</i> | 3    |             | 24 | 73 |
| mz_147        | Dichlorobenzene                | m/z 149        | 3    | 1 (+/- 1)   | 26 | 43 |
| mz_151        | Pinonaldehyde                  | <i>unknown</i> | 2.40 |             | 46 | 48 |

#### 2.3.4.

This is the most critical part to me

61) How did you perform blanks with the gas calibration unit. Did you have n2? Synthetic air, catalytic converter? If the latter at which temperature? Also how is your blank for compounds such as acetic acid?

The gas calibration unit is equipped with a catalytic VOC scrubber made of Pt/Pd and heated at 350°C. An example of blank and ambient measurements for acetic acid is provided Figure R5.

The description of our blank system has been completed as:

*l. 170: "A Gas Calibration Unit (GCU, IONICON, Austria), equipped with a catalytic VOC scrubber made of Pt/Pd and heated at 350°C, was used for 1-hour blanks every 13 hours and for regular calibrations, about once a month: a VOC standard mixture was injected through the dilution system inside the GCU to perform steps at different volume mixing ratios (VMR, ranging from 1 to 20 ppb)."*

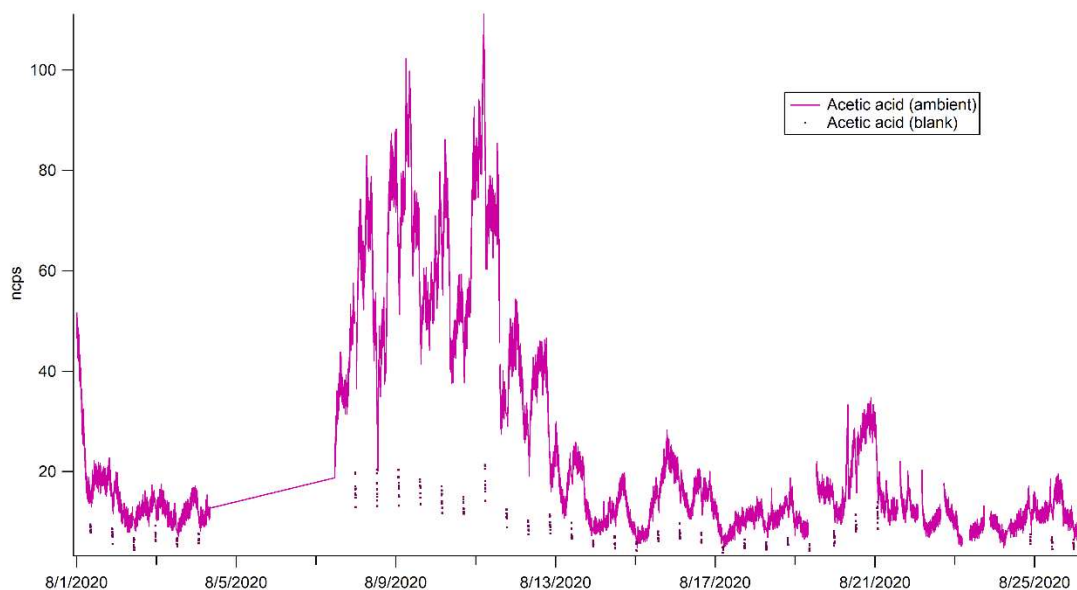

Figure R5: Example of ambient and blank measurements of acetic acid for August 2020

62) Did you find a drift in your cal factors over time? Somehow it may seem one month per doing calibrations is too long. I would like to see a list of calibrations and how these change when ptr parameters are changed.

63) Please show cal factors (ncps/ppbv) per each compound and how they drift with time and with cal gas. This also adds to the comment on transmission. Add the NPL cal gas, and please show how did you account for the variations in calgas. This is very important for the compounds used to calculate the transmission curve. Please also state which compounds are those.

For continuous long-term measurements, Ionicon suggests calibrating approximately once per month (GCU user manual, IONICON, 2010).

Figure R2 (Figure 2 in the revised paper) represents the temporal evolution of the sensitivities of methanol, acetone and benzene for the different used standards. The most important changes in the sensitivities correspond to maintenances and change of parameters (i.e., detector voltage), whereas standard changes do not lead to significant variations in the sensitivity. The sensitivities can also decrease with the use of the instrument, especially when the ion source gets dirty, as can be seen in the beginning of 2020. This period is followed by a long break during the Covid-19 Spring lockdown, when a maintenance was needed. After this maintenance, the sensitivities are a little higher, and again slowly decrease with the use of the instrument. We note that the change of standard in September 2020 does not lead to a significant change of sensitivity. Another maintenance was performed in early 2021, leading to higher sensitivities. Then, the SEM voltage had to be gradually increased, resulting in higher sensitivities, until the detector was changed in April 2021. A longer maintenance was necessary in summer 2021, following which the sensitivities were stable, even when the standard was changed in early 2022. For the data treatment, the sensitivities are interpolated between each calibration.

Table R1 lists all measured sensitivities with the corresponding standard and the SEM voltage and is added in the supplementary material as Table S3.

The compounds used for the transmission curve are methanol, acetonitrile, acetaldehyde, propenal, benzene, toluene, C8-aromatics, C9-aromatics, dichlorobenzene and trichlorobenzene, they are indicated in the revised text.

This is completed and rephrased in the main text as: “After each calibration, the transmission is calculated for some of the calibrated compounds (methanol, acetonitrile, acetaldehyde, propenal, benzene, toluene, C8-aromatics, C9-aromatics, dichlorobenzene and trichlorobenzene, when available) using their measured sensitivities (Eq. S1). As an example, two consecutive transmission curves are presented on Figure S2, for 1st July 2020 and 7th August 2020. The transmission coefficients are interpolated linearly over time. The same standards are used for the transmission than the calibration, since we use the measured sensitivities to calculate the transmission. The compounds which could fragment are not included in the calculation of the transmission curve (e.g., isoprene, monoterpenes). Different standards were used throughout the study period (see Table S2), allowing to directly calibrate 9 to 13 species, depending on the standard. The obtained sensitivity coefficients are given in Table S3 with the standard used and the detector voltage. Figure 2 presents the temporal evolution of these measured sensitivity coefficients for methanol, acetone and benzene shape-coded by the standard reference, as well as the maintenance periods. Here, a sensitivity decrease is observed with the use of the PTR-MS (i.e., ion source dirtying, detector aging) while an increase was obtained with detector voltage increase. Therefore, it is important to note that the largest changes of sensitivity were due to instrumental evolution and not to changes of standard.”

NPL is added to Table S2:

Table S2: Standards used for PTR-MS calibrations

| Start      | End        | Standard reference      | Species in the standard used for direct calibrations                                                                                                              | VMR     |
|------------|------------|-------------------------|-------------------------------------------------------------------------------------------------------------------------------------------------------------------|---------|
| 18-01-2020 | 10-09-2020 | R0904, Ionicon Analytik | Methanol, Acetonitrile, Acetaldehyde, Acrolein, Acetone, Isoprene, Crotonaldehyde, 2-Butanone, Benzene, Toluene, o-Xylene, $\alpha$ -pinene, 1,2-Dichlorobenzene  | 1 ppm   |
| 10-09-2020 | 15-06-2020 | L5387, Ionicon Analytik | Methanol, Acetonitrile, Acetone, Isoprene, Benzene, Toluene, Xylenes, Trimethylbenzene, 1,2-Dichlorobenzene                                                       | 100 ppb |
| 01-09-2021 | 28-04-2022 | D155286, SIAD           | Methanol, Acetonitrile, Acetaldehyde, Acrolein, Acetone, MEK, Benzene, Toluene, o-Xylene, $\alpha$ -pinene, 1,2-Dichlorobenzene                                   | 1 ppm   |
| 23-05-2022 | current    | NPL                     | Methanol, Acetonitrile, Acetaldehyde, Acetone, Isoprene, Dimethylsulfide, 3-Buten-2-one, 2-Butanone, Benzene, Toluene, m-Xylene, 1,2,4-Trimethylbenzene, 3-Carene | 1 ppm   |

Table R1: Sensitivity coefficients (ncps/ppb) throughout the 2020-2021 period

| Time       | SEM voltage (V) | Standard | mz_33<br>Methanol | mz_42<br>Acetonitrile | mz_45<br>Acetaldehyde | mz_57<br>Propenal | mz_59<br>Acetone | mz_69<br>Isoprene |
|------------|-----------------|----------|-------------------|-----------------------|-----------------------|-------------------|------------------|-------------------|
| 1/15/2020  | 2975            | R0904    | 10.71             | 19.52                 | 18.97                 | 17.67             | 21.22            | 6.55              |
| 1/21/2020  | 2975            | R0904    | 9.43              | 18.18                 | 17.63                 | 15.81             | 19.12            | 5.72              |
| 2/25/2020  | 2975            | R0904    | 9.63              | 16.23                 | 15.91                 | 13.83             | 16.47            | 4.75              |
| 6/11/2020  | 3100            | R0904    | 11.73             | 20.13                 | 20.09                 | 18.80             | 21.90            | 7.29              |
| 7/1/2020   | 3100            | R0904    | 11.32             | 20.45                 | 21.37                 | 18.14             | 22.72            | 7.24              |
| 8/7/2020   | 3100            | R0904    | 11.97             | 19.64                 | 19.02                 | 17.97             | 20.69            | 6.87              |
| 9/10/2020  | 3050            | R0904    | 11.41             | 17.01                 | 16.37                 | 14.04             | 16.86            | 4.73              |
| 10/9/2020  | 3050            | L5387    | 10.04             | 17.89                 |                       |                   | 17.15            | 4.14              |
| 11/9/2020  | 3050            | L5387    | 7.10              | 17.38                 |                       |                   | 16.91            | 4.07              |
| 12/11/2020 | 3050            | L5387    | 8.28              | 16.98                 |                       |                   | 16.96            | 3.62              |
| 1/15/2021  | 3200            | L5387    | 8.62              | 21.14                 |                       |                   | 21.32            | 5.38              |
| 1/28/2021  | 3200            | L5387    | 9.95              | 21.87                 |                       |                   | 23.14            | 6.10              |
| 2/25/2021  | 3250            | L5387    | 9.43              | 22.10                 |                       |                   | 25.41            | 6.76              |
| 4/6/2021   | 3375            | L5387    | 10.93             | 24.01                 |                       |                   | 26.82            | 7.25              |
| 4/26/2021  | 2300            | L5387    | 9.21              | 18.87                 |                       |                   | 19.19            | 5.52              |
| 5/27/2021  | 2350            | L5387    | 8.91              | 19.53                 |                       |                   | 20.04            | 5.06              |
| 8/16/2021  | 2350            | D155286  | 8.35              | 14.37                 | 18.72                 | 16.30             | 21.71            | 6.46              |
| 9/10/2021  | 2350            | D155286  | 7.87              | 10.20                 | 12.66                 | 8.58              | 12.99            | 3.82              |
| 9/20/2021  | 2350            | D155286  | 7.17              | 14.19                 | 12.72                 | 8.59              | 12.12            | 3.66              |
| 10/25/2021 | 2375            | D155286  | 5.92              | 10.37                 | 12.05                 | 4.15              | 10.98            | 3.31              |
| 11/16/2021 | 2425            | D155286  | 5.43              | 9.25                  | 11.48                 | 7.99              | 10.57            | 2.64              |
| 11/16/2021 | 2425            | D155286  | 5.72              | 9.50                  | 11.85                 | 8.29              | 10.71            | 2.57              |
| 12/15/2021 | 2450            | D155286  | 6.20              | 10.66                 | 12.25                 | 8.93              | 11.53            | 2.84              |

| Time       | SEM voltage (V) | Standard | mz_73<br>MEK | mz_79<br>Benzene | mz_93<br>Toluene | mz_107<br>C8-Aromatics | mz_137<br>Monoterpenes | mz_147<br>Dichlorobenzene |
|------------|-----------------|----------|--------------|------------------|------------------|------------------------|------------------------|---------------------------|
| 1/15/2020  | 2975            | R0904    | 18.63        | 8.28             | 7.95             | 7.06                   | 1.34                   | 1.65                      |
| 1/21/2020  | 2975            | R0904    | 16.39        | 7.77             | 7.05             | 6.03                   | 1.15                   | 1.36                      |
| 2/25/2020  | 2975            | R0904    | 13.54        | 6.12             | 5.45             | 4.55                   | 0.84                   | 0.90                      |
| 6/11/2020  | 3100            | R0904    | 18.56        | 9.48             | 9.20             | 8.33                   | 1.69                   | 1.94                      |
| 7/1/2020   | 3100            | R0904    | 19.75        | 8.80             | 8.85             | 8.01                   | 1.66                   | 1.81                      |
| 8/7/2020   | 3100            | R0904    | 17.66        | 8.37             | 8.03             | 7.08                   | 1.39                   | 1.56                      |
| 9/10/2020  | 3050            | R0904    | 13.76        | 5.95             | 5.43             | 4.47                   | 0.81                   | 0.94                      |
| 10/9/2020  | 3050            | L5387    |              | 5.31             | 4.70             | 3.90                   |                        | 0.84                      |
| 11/9/2020  | 3050            | L5387    |              | 4.99             | 4.24             | 3.45                   |                        | 0.80                      |
| 12/11/2020 | 3050            | L5387    |              | 4.52             | 4.70             | 3.33                   |                        | 0.68                      |

|            |      |         |       |       |       |       |      |      |
|------------|------|---------|-------|-------|-------|-------|------|------|
| 1/15/2021  | 3200 | L5387   |       | 7.68  | 6.89  | 6.15  |      | 1.52 |
| 1/28/2021  | 3200 | L5387   |       | 8.23  | 8.07  | 6.92  |      | 1.75 |
| 2/25/2021  | 3250 | L5387   |       | 9.72  | 9.53  | 8.57  |      | 2.08 |
| 4/6/2021   | 3375 | L5387   |       | 12.23 | 11.92 | 10.81 |      | 3.26 |
| 4/26/2021  | 2300 | L5387   |       | 6.81  | 6.81  | 4.99  |      | 1.42 |
| 5/27/2021  | 2350 | L5387   |       | 7.28  | 6.17  | 4.79  |      | 1.32 |
| 8/16/2021  | 2350 | D155286 | 18.65 | 9.11  | 8.82  | 7.76  | 1.50 | 1.75 |
| 9/10/2021  | 2350 | D155286 | 10.57 | 4.35  | 3.64  | 2.62  | 0.44 | 0.57 |
| 9/20/2021  | 2350 | D155286 | 9.79  | 4.20  | 3.31  | 2.37  | 0.39 | 0.45 |
| 10/25/2021 | 2375 | D155286 | 8.63  | 4.03  | 3.01  | 2.10  |      | 0.37 |
| 11/16/2021 | 2425 | D155286 | 7.72  | 3.18  | 2.45  | 1.66  |      | 0.29 |
| 11/16/2021 | 2425 | D155286 | 7.64  | 3.37  | 2.53  | 1.83  |      | 0.29 |
| 12/15/2021 | 2450 | D155286 | 8.57  | 3.59  | 2.79  | 1.97  | 0.29 | 0.39 |

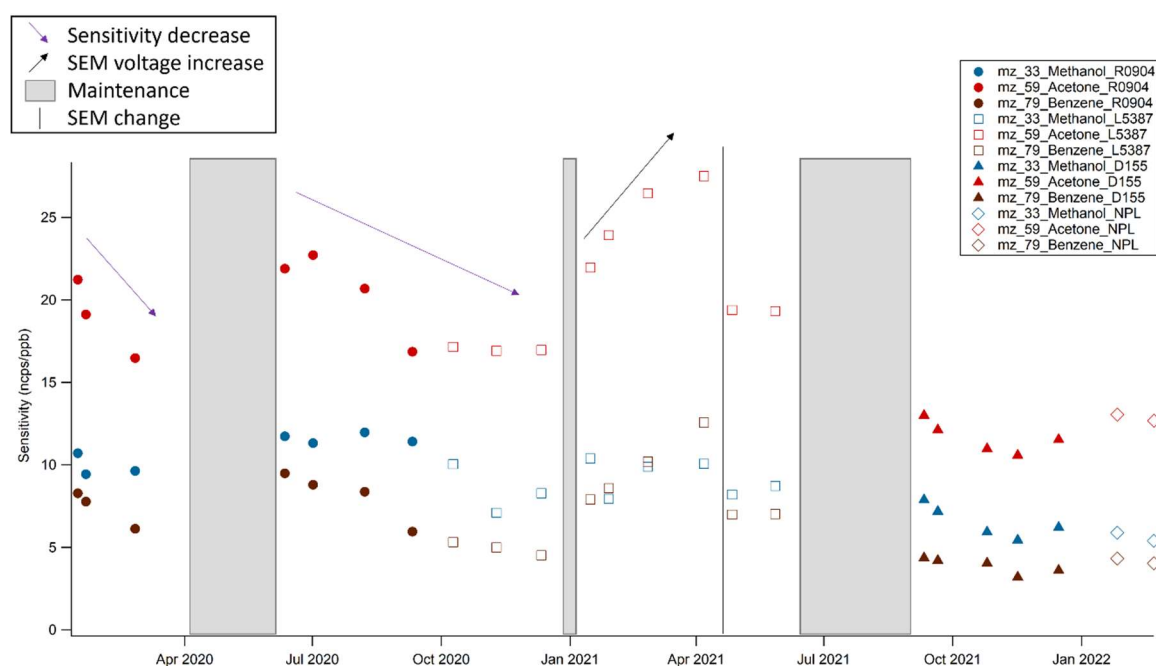

Figure R2: Time series of sensitivities vs time for methanol, acetone and benzene. Standard references are indicated by the shape of the data points (cf Table S2).

64) Line 175-179: please rephrase.... This is very confusing. When did you do these tests?

These sentences were completed: "This standard was also used to infer the repeatability of the measurement at the end of May 2022: it was sampled with the same protocol (same dilution, a blank before and after) over 3 consecutive days, while environmental conditions (i.e., temperature and relative humidity) might vary a little. The obtained coefficients of variation for

*this test ranged from 1 to 26% (mean value: 7%). In addition, the influence of humidity on the sensitivity was investigated by performing calibrations using the NPL standard at set relative humidities (RH) of 30%, 60% and 90% on August 4<sup>th</sup>, 2022.”*

65) About humidity in calibrations, did you perform humid calibrations or not? How did you apply this effect?

The calibrations are performed at the ambient humidity since ambient air passes through the scrubber. The humidity tests mentioned above showed a very low humidity dependence (see response to the comment 66 below), so no correction was applied, but it was taken into account in the uncertainty calculation (Section 2.4.4).

66) How did you interpolate sensitivities? Did you interpolate humidity effect over time? Also I guess the impact of humidity is totally different depending the compounds. Please show.

The sensitivities were linearly interpolated. The humidity effect was not interpolated because it was observed to be very low (see Table R2 and Figure R6).

*This is added in the revised text: “In addition, the influence of humidity on the sensitivity was investigated by performing calibrations using the NPL standard at set relative humidities (RH) of 30%, 60% and 90% on August 4<sup>th</sup>, 2022. Results for these tests are presented in Table S4 and Figure S3, the humidity dependency of the sensitivities for the considered species ranges in 1-7% with an average of 3%. The difference is much lower for the RH range 60-90%, which corresponds to 72% of the data, than for the range 30-60%.”*

Table R2: Sensitivities (ncps/ppb) obtained for calibrations at various relative humidities

| Relative humidity | m/z 33 | m/z 42 | m/z 45 | m/z 59  | m/z 69  | m/z 71  |
|-------------------|--------|--------|--------|---------|---------|---------|
| 30 %              | 8.1    | 17.0   | 20.5   | 22.4    | 8.6     | 23.3    |
| 60 %              | 8.1    | 19.0   | 18.2   | 22.1    | 7.9     | 21.0    |
| 90 %              | 8.7    | 19.6   | 18.8   | 22.7    | 8.0     | 21.9    |
| CV (%)            | 5      | 7      | 6      | 1       | 5       | 5       |
| Relative humidity | m/z 73 | m/z 79 | m/z 93 | m/z 107 | m/z 121 | m/z 137 |
| 30 %              | 21.9   | 13.6   | 14.4   | 13.6    | 11.1    | 4.1     |
| 60 %              | 22.2   | 13.3   | 14.4   | 13.4    | 10.7    | 4.1     |
| 90 %              | 22.4   | 13.2   | 14.2   | 13.3    | 10.8    | 4.2     |
| CV (%)            | 1      | 1      | 1      | 1       | 2       | 2       |

*CV = coefficient of variation*



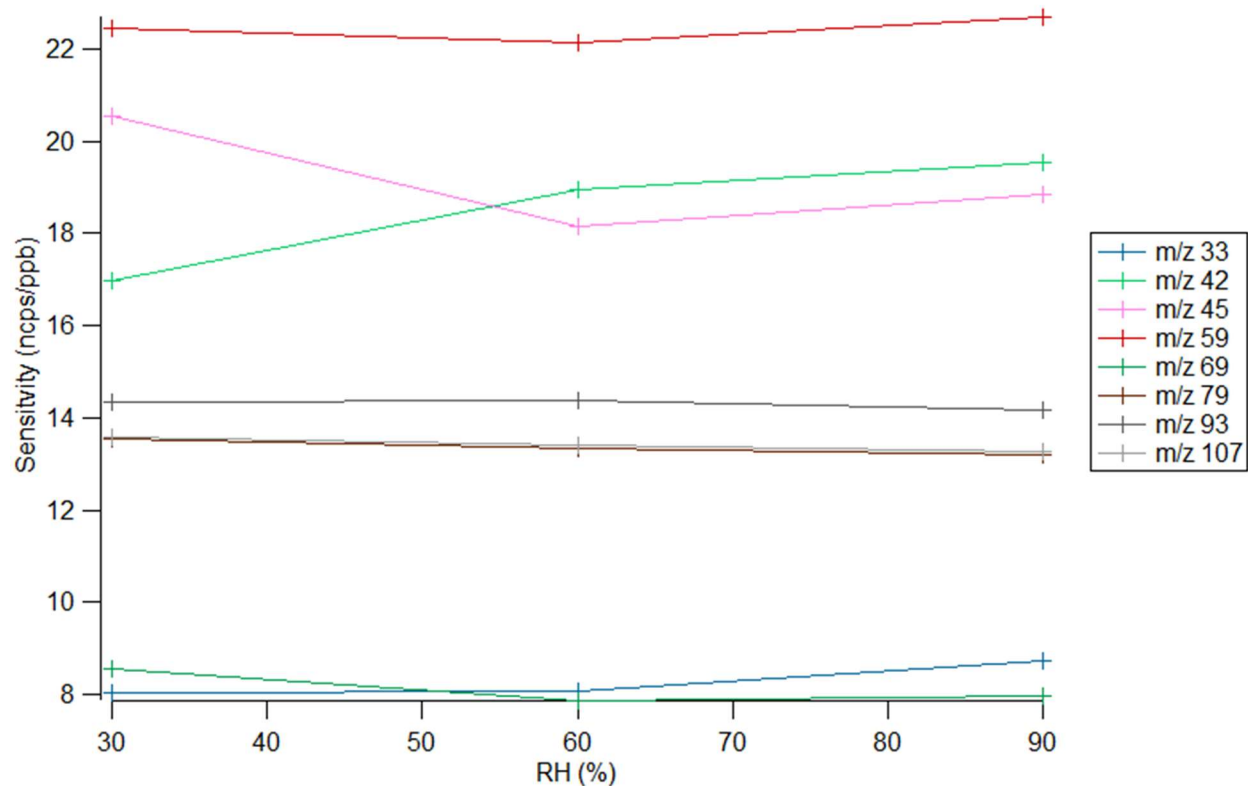

Figure R6: Sensitivities vs RH for methanol, acetonitrile, acetaldehyde, acetone, isoprene + furan, benzene, toluene, C8-aromatics

#### 2.4.1.

67) What is stable ambient air? Can you please rephrase this part? What do you mean check the stability?

Table R3 (Table S5 in the revised paper) presents the mean and standard deviation of the target bottle measurements for species with a signal > 10 ppt, and Figure R7 (Figure S4 in the revised paper) presents the temporal evolution of these measurements for benzene and acetone.

This part is rephrased as: “A target bottle, containing ambient air, is measured once per week, in order to check that the measurements do not deviate too much from their mean value. The mean and standard deviation values for the target bottle measurements of ions that have a signal > 10 ppt are given in Table S5, and the temporal evolution of these measurements for benzene and acetone is presented in Figure S4.”

Table R3: Mean and standard deviation values for target bottle measurements

| m/z                | m/z 33 | m/z 42 | m/z 45 | m/z 46 | m/z 57 | m/z 59 | m/z 60 | m/z 61  | m/z 69  | m/z 71 |
|--------------------|--------|--------|--------|--------|--------|--------|--------|---------|---------|--------|
| Mean (ppb)         | 3.22   | 0.25   | 23.68  | 1.04   | 1.53   | 16.58  | 0.86   | 0.53    | 1.82    | 0.57   |
| Standard deviation | 0.72   | 0.03   | 2.68   | 0.57   | 0.43   | 0.98   | 0.16   | 0.27    | 0.24    | 0.17   |
| m/z                | m/z 73 | m/z 79 | m/z 83 | m/z 85 | m/z 87 | m/z 93 | m/z 97 | m/z 107 | m/z 121 |        |
| Mean (ppb)         | 1.38   | 0.41   | 0.51   | 0.31   | 1.90   | 0.39   | 0.39   | 0.59    | 0.34    |        |
| Standard deviation | 0.18   | 0.05   | 0.16   | 0.16   | 0.32   | 0.05   | 0.16   | 0.10    | 0.15    |        |

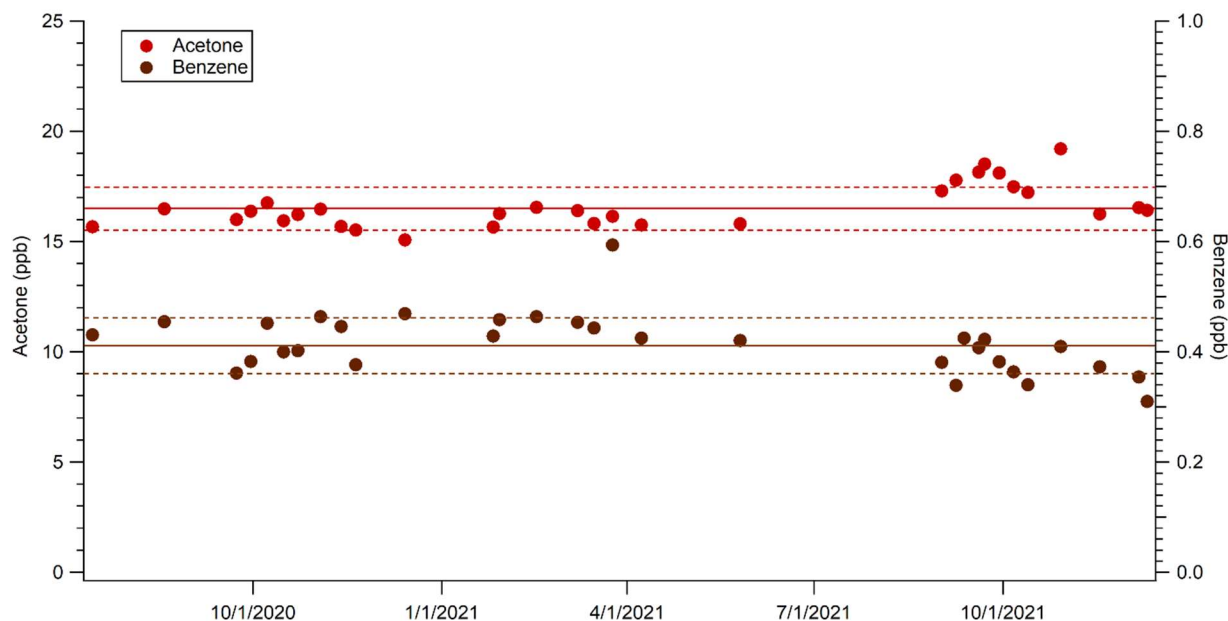

Figure R7: Temporal evolution of acetone and benzene measurements from the target bottle. The lines represent the mean value while the dashed lines represent mean +/- standard deviation.

#### 2.4.2.

68) Line 205: please state inner diameter, as this is the same residence time as expressed in line 143, however with a different flow. Thus Both ptr system sample from different lines? Please restate to make it clear.

The residence time is similar because the pump flow has been increased in order to compensate for the longer line length. Both PTR-MS are not in the same room and do not have the same sampling line.

This part is thus rephrased: “The PTR-ToF-MS was installed in another room than the PTR-Q-MS, and with a different setup. A second 16-m PFA sampling line with an inner diameter of 9.63 mm, isolated and heated at 50°C was used to sample at the same height as the PTR-Q-MS. A pump provided a flow of 22 L·min<sup>-1</sup>, thus resulting in a residence time of about 3 seconds.”

69) Line 206 ohh so here is the catalytic converter. Only performed once per two days? This is too long, it changes with time.. even 13hrs may be too long.....

We agree with the reviewer that a higher frequency of blanks would be better. Note that we have increased the frequency of the blank measurements for the PTR-Q-MS in early 2022 to every 6 hours.

The set-up of the PTR-ToF-MS is different than the PTR-Q-MS one, please note that this catalytic converter is not the same as the one in the GCU. Blanks performed during the PTR-ToF-MS campaigns are presented on Figure R8 (Figure S5 in the revised paper), for the m/z used for the main isobaric speciation (m/z 46, 47, 57, and 69).

During the lockdowns, it was not possible to come on site to perform manual blanks (and no automatic method could be setup). Please note that during the periods “spring/summer campaign” and “autumn campaign & lockdown”, while there was not a total lockdown like the spring lockdown, it was only possible to come once to twice a week on site.

The Figure R8 is added to the supplementary material and a short explanation is given in the main text: “Figure S5 presents the temporal evolution of the obtained blanks where the different periods (i.e., campaigns, lockdowns) are highlighted. Most of these blanks are rather stable, and they are interpolated for the data treatment.”

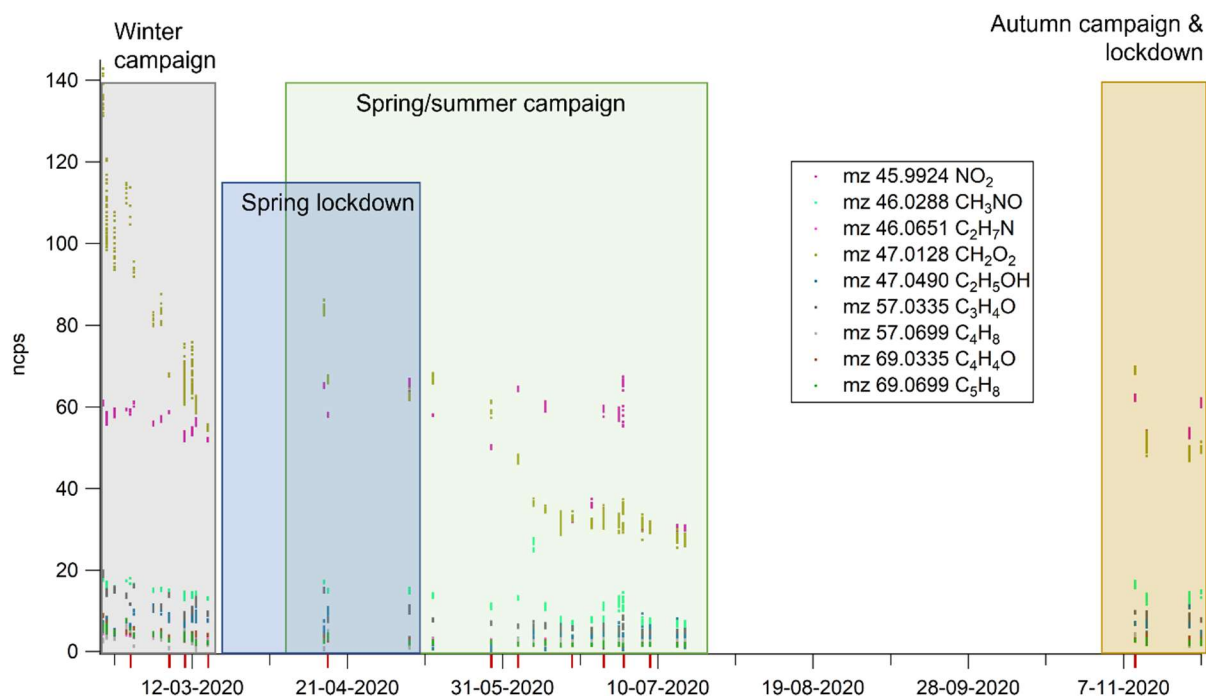

Figure R8: Blanks performed in 2020 for a selection of PTR-ToF-MS m/z. Calibrations are indicated by red sticks.

70) Line 209: how are these calibrations done with the internal standard?

The calibrations are done with an external standard, in a similar way than for the PTR-Q-MS. However, the dilution system is different than the one used for the PTR-Q-MS measurements. For the PTR-Q-MS we use flowmeters inside the GCU system while for the PTR-ToF-MS the dilution system with the flowmeters is inside the instrument. The calibration standards used were a canister (Figure R9) until mid-May 2020 and the standard bottle D155286 (Table S2) from mid-May 2020.

l. 208 is rephrased and completed as: *“Calibrations were done about once a month using the internal dilution system (flowmeters located inside the instrument). The calibration standards used were a canister (Figure S6) until mid-May 2020 and the standard bottle D155286 (Table S2) from mid-May 2020.”*

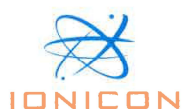

Research & Development  
office@ionicon.com

IONICON ANALYTIK GMBH  
Eduard-Bodem-Gasse 3  
A-6020 Innsbruck  
AUSTRIA

Tel: +43 512 214 800  
Fax: +43 512 214 800 099  
www.ionicon.com

## Gas Canister VOC Standard Quality Assurance Certificate

Gas canister serial number: **R2845**

Ionicon guarantees the listed concentrations for a period of 6 months.  
Uncertainty is an estimate of a combination of the uncertainties of the original gravimetric preparation and subsequent analysis.

| Compound            | Volume mixing ratio / ppm | Uncertainty / % |
|---------------------|---------------------------|-----------------|
| Methanol            | 0.99                      | ±6              |
| Acetonitrile        | 0.99                      | ±6              |
| Acetaldehyde        | 0.95                      | ±5              |
| Ethanol             | 1.00                      | ±5              |
| Acrolein            | 1.01                      | ±5              |
| Acetone             | 0.98                      | ±5              |
| Isoprene            | 0.95                      | ±5              |
| Crotonaldehyde      | 1.01                      | ±5              |
| 2-Butanone          | 0.99                      | ±5              |
| Benzene             | 0.99                      | ±5              |
| Toluene             | 0.99                      | ±6              |
| o-Xylene            | 1.02                      | ±6              |
| Chlorobenzene       | 1.01                      | ±5              |
| α-Pinene            | 1.01                      | ±5              |
| 1,2-Dichlorobenzene | 1.02                      | ±5              |

Gas canisters are filled at a gauge pressure of 2.8 - 3.8 bar and are leak tested for tightness prior to shipping. Should the canister arrive at a pressure lower than the above range, please contact Ionicon immediately; the canister may have developed a leak during transportation and should be returned to Ionicon for refilling.

Jürgen Dunkl  
Canister filled by

  
Signature

10 December 2018  
Date

Ionicon Stamp:

**IONICON ANALYTIK**  
Gesellschaft mbH  
Eduard-Bodem-Gasse 3  
6020 Innsbruck, Austria  
Tel.: +43 (0) 512 214 800  
Fax: +43 (0) 512 214 800-099  
office@ionicon.com  
www.ionicon.com

Doc v.4.3; 01.03.2018

Page 1 of 1

Figure R9: Certificate of the canister R2845 used for PTR-ToF-MS calibrations.

2.4.3.

S3 text

71) If you cant calibrate for formaldehyde, drop it...

As m/z 31 is presented as “formaldehyde proxy”, we would like to keep it as it is. In the figures of this paper, m/z 31 is not presented alone, only within the sum of oxygenated, where it constitutes only 2%.

72) The main source for acetaldehyde is not biomass burning (or not only). There is photochemistry and even biogenic. Please rephrase and show references.

Thank you for pointing that out, it was a mistake, biomass burning should have been associated to acetonitrile and not acetaldehyde. Both sentences are rephrased as: “At m/z 42, CH<sub>3</sub>CN (acetonitrile) is the main compound measured; interferences from other compounds are negligible (Yuan et al., 2017b). Acetaldehyde is the main component detected at m/z 45 (de Gouw and Warneke, 2006).”

73) m/z 46 how can you calibrate for them two with transmission only?the same goes for m57

We are not sure what is meant here, nevertheless here are some information about the calibration of m/z 46 and m/z 57. m/z 46 is calibrated by transmission only while m/z 57 is calibrated using a standard containing propenal for most of the periods and using the transmission from October 2020 to June 2021.

74) you say corresponds when I think the word here is we have assigned this mass to this compound. Please change.

Following the reviewer’s suggestion, the wording “assigned to” has been used in the revised Text S3 as:

“m/z 31 was assigned to CH<sub>2</sub>O (formaldehyde), which cannot be precisely quantified by PTR-MS, due to its proton affinity being too close to that of water, and is thus defined as its proxy. m/z 33 was assigned to CH<sub>3</sub>OH (methanol), the main alcohol present in the atmosphere, and is also the most important oxygenated VOC; although at this mass there are interferences from O<sub>2</sub><sup>+</sup>, thus resulting in a high background. At m/z 42, CH<sub>3</sub>CN (acetonitrile) is the main compound measured; interferences from other compounds are negligible (Yuan et al., 2017b). Acetaldehyde is the main component detected at m/z 45 (de Gouw and Warneke, 2006). m/z 46 can correspond to several compounds: it was mostly identified as CH<sub>3</sub>NO and C<sub>2</sub>H<sub>7</sub>N, respectively formamide and dimethylamine, both compounds emitted by agricultural activities (Yuan et al., 2017a; Kammer et al., 2019). However, a few studies reported this mass as NO<sub>2</sub><sup>+</sup>, that would correspond notably to peroxyacetyl nitrate (PAN) fragmentations (Yuan et al., 2017b) or other organic nitrates (Aoki et al., 2007; Duncianu et al., 2017), but cannot be precisely quantify using H<sub>3</sub>O<sup>+</sup> ionization. In this study, we will refer to it as m/z 46 (or m46). m/z 47 was assigned to C<sub>2</sub>H<sub>6</sub>O (ethanol) and CH<sub>2</sub>O<sub>2</sub> (formic acid) and will therefore be referred to as their sum, although the sensitivity of ethanol is lower than that of formic acid. Their seasonal contribution can be found in Table 2, and shows that m/z 47 is dominated by formic acid in spring and

summer (> 90%), but in autumn and winter, ethanol contribution becomes significant. This is a similar trend to that of furan's and isoprene's contributions to  $m/z$  69.  $m/z$  57 is usually attributed to propenal ( $C_3H_4O$ ) (Knighton et al., 2007; Languille et al., 2020), but there are interferences from  $C_4H_8$ : butenes or other hydrocarbons' fragmentations, that cannot be precisely quantified but seem to be dominant in our study (Table 2).  $m/z$  58 was assigned to allylamine, a compound emitted by agricultural activities (Kammer et al., 2019).  $m/z$  59 could correspond to  $C_3H_6O$  (acetone + propenal),  $C_4H_{10}$  (butane) and  $C_2H_2O_2$  (glyoxal); PTR-ToF-MS measurements showed that in all seasons,  $C_3H_6O$  is dominant by about 97%. de Gouw and Warneke (2007) indicated that propenal is also negligible and  $m/z$  59 can be regarded as acetone only.  $m/z$  60 was assigned to trimethylamine, which is mostly emitted by agricultural activities (Kammer et al., 2019).  $m/z$  61 is attributed to acetic acid, an agricultural and biogenic compound.  $m/z$  63 was assigned to dimethylsulfide, emitted by phytoplanktonic activities in the oceans.  $m/z$  69 was assigned to  $C_4H_4O$ : furan and  $C_5H_8$ : isoprene and fragments of methylbutenol (MBO), but PTR-ToF-MS measurements showed that MBO is negligible (see discussion of  $m/z$  87). Furan is emitted by biomass-burning activities and has highest contributions in autumn and winter (47-67% of  $m/z$  69, Table 2); while in spring and summer,  $m/z$  69 can be almost exclusively attributed to isoprene (94-96% of  $m/z$  69, Table 2), due to its important biogenic source, although it can also be emitted by anthropogenic sources (Borbon et al., 2001; Wagner and Kuttler, 2014; Panopoulou, 2020).  $m/z$  71 was mainly (by about 85%) attributed to  $C_4H_6O$ , the sum of methyl vinyl ketone (MVK), methacrolein (MACR), ISOPOOH, and crotonaldehyde. ISOPOOH are formed from isoprene oxidation under low  $NO_x$  conditions (Surratt et al., 2010; Budisulistiorini et al., 2013), and so are expected to be low in a suburban area. In summer, MVK + MACR would be dominant as they are the main isoprene oxidation products, and crotonaldehyde might dominate  $m/z$  71 in winter, due to its wood burning source (Lipari et al., 1984; Languille et al., 2020). Due to its overall higher level in summer, this  $m/z$  will be considered as MVK + MACR.  $m/z$  73 was mainly attributed to methyl ethyl ketone (MEK) in ambient air (Yuan et al., 2017b).  $m/z$  75 was identified as  $C_3H_6O_2$  (methylacetate, hydroxyacetone, propanoic acid); methylacetate would be a biomass burning compound (Bruns et al., 2017), while hydroxyacetone and propanoic acid are of biogenic origins (Yuan et al., 2017b). It is not possible to separate these compounds because they are isomers, but methylacetate is expected to be the dominant VOC in winter and hydroxyacetone + propanoic acid to be dominant in summer.  $m/z$  79 was assigned to benzene ( $C_6H_6$ ).  $m/z$  81 was assigned to fragments of monoterpenes (mostly) and of PAHs.  $m/z$  83 was identified as methylfuran ( $C_5H_6O$ ), that can be found in biomass burning plumes (Bruns et al., 2016), and as a minor oxidation product of isoprene (Kroll et al., 2006; and references therein). This mass was also identified as  $C_6H_{10}$ , fragments of hydrocarbons (HC) from gasoline and diesel cars (Gueneron et al., 2015). In winter and autumn, methylfuran is dominant (Table 2) while  $C_6H_{10}$  is significant in spring and summer.  $m/z$  85 was mainly assigned to methylbutenone ( $C_5H_8O$ ), identified as a biomass burning compound by (Bruns et al., 2017) and as a biogenic compound by Kroll et al. (2006).  $m/z$  87 was assigned to  $C_4H_6O_2$  (butanedione + methacrylic acid) and  $C_5H_{10}O$  (methylbutenol, MBO). Butanedione was found in biomass burning plumes (Bruns et al., 2017), methacrylic acid was identified as an isoprene oxidation product (Williams et al., 2001; Nguyen, 2012) and MBO was shown to be emitted by biogenic sources (Holzinger et al., 2005; Kim et al., 2010). PTR-ToF-MS measurements showed that  $C_4H_6O_2$  is dominant (> 80%), thus butanedione would be the main compound in winter and methacrylic acid (MAA) in summer.  $m/z$  93 was assigned to toluene ( $C_7H_8$ ), a major traffic compound.  $m/z$  97 can be attributed to several compounds such

as C2-substituted furans and furaldehydes (Yuan et al., 2017b), but Bruns et al. (2017) reported this mass as furfural (C<sub>5</sub>H<sub>4</sub>O<sub>2</sub>) in biomass-burning influenced regions, and Languille et al. (2020) also defined m/z 97 as furfural in winter at SIRTA. m/z 99 was identified as C<sub>5</sub>H<sub>6</sub>O<sub>2</sub> (furfuryl alcohol) by (Stockwell et al., 2015), and as C<sub>4</sub>H<sub>2</sub>O<sub>3</sub> (furandione) by Bruns et al. (2017), both present in aged biomass burning plumes. In this study, both compounds are present so this mass will be regarded as their sum. m/z 107 was assigned to C<sub>8</sub>H<sub>10</sub> (C8-aromatics: xylenes, ethylbenzene) and C<sub>7</sub>H<sub>6</sub>O (benzaldehyde); C8-aromatics are dominant by about 80% (Table 2), and thus this mass will be regarded as mainly C8-aromatics. m/z 111 was identified as benzenediol by Bruns et al. (2016) as a biomass burning compound. m/z 121 was assigned to C9-aromatics (trimethylbenzenes), mainly emitted by traffic. m/z 137 was assigned to monoterpenes, for which the main source is supposed to be biogenic, although anthropogenic sources, traffic and wood burning, were identified recently (Panopoulou et al., 2020). m/z 139 was assigned to nopinone, an oxidation product of monoterpenes. m/z 147 was assigned to dichlorobenzene. m/z 151 is identified as C<sub>9</sub>H<sub>10</sub>O<sub>2</sub>, pinonaldehyde, an alpha-pinene ozonolysis product. Pinonaldehyde is measured at m/z 169 and at m/z 151, which corresponds to pinonaldehyde-H<sub>2</sub>O.”

#### 2.4.4.

75) Please state how did you calculate the statistical error, the systematic error, and how did you use the theory of error propagation. This information is totally missing. Also how did you calculate the LOD.

76) I think you cant cite ACTRIS guidelines, because they are not ready yet. On the other hand please state which are those guidelines.

This part is completed in the main text of the revised version as: “The detection limit (LOD) and the uncertainties for each m/z were calculated using the formulas from the ACTRIS guidelines (in preparation), which are based on de Gouw and Warneke (2006):

$$LOD = 3 \times \frac{\sqrt{C_{RH^+}^{blank}}}{S_m(RH^+)} \quad (1)$$

With  $C_{RH^+}^{blank}$  the ion count per second of the blank signal and  $S_m(RH^+)$  the unnormalized sensitivity (cps/ppb).

$$Uncertainty = \sqrt{Precision^2 + Accuracy^2 + 0.05^2} \quad (2)$$

With the precision calculated as the relative standard deviation:

$$RSD = \frac{\sqrt{C_{RH^+}^{ambient} + C_{RH^+}^{blank}}}{C_{RH^+}^{ambient} - C_{RH^+}^{blank}} \quad (3)$$

With  $C_{RH^+}^{ambient}$  and  $C_{RH^+}^{blank}$  the ion counts for the ambient and blank signals, respectively.



*The accuracy corresponds to the quadratic propagation of the error on the GCU and on the standard. The error on the GCU was evaluated to be equal to 10% and the errors on the standard for each compound are available on its certificate and range from 5 to 10%. Finally, an error of 5% is added to take into account the uncertainty due to humidity changes.*

77) Line 223 what do you mean by internal quality check by carefully verifying? How is the quality check by ACTRIS, please state. What is ebas database, please state.

*This part is completed as: “An internal quality check is performed on all m/z, while an external quality control is also performed by ACTRIS on 12 masses corresponding to the following compounds: benzene, propenal+C<sub>4</sub>H<sub>8</sub>, isoprene+furan, C<sub>8</sub>-aromatics, monoterpenes, toluene, acetonitrile, acetaldehyde, acetone, MEK, methanol and MVK+MACR. The internal quality control corresponds to carefully verifying each step of the data treatment and the obtained data and deleting erroneous or outlier data points. The external quality check is performed by the Central Facility unit of ACTRIS responsible for VOCs measurements (CiGas). It consists in carefully examining the dataset and performing different figures (e.g., scatter plots, ...) to point out and discuss questionable data (outliers, potential contamination....). These data can then be flagged accordingly (valid but lower than the detection limit, valid but corresponding to a local event, or missing because invalidated). In addition, for long-lived compounds, a comparison with baseline values from other European station is performed to check the consistency of the datasets. Once the submitted data and corresponding flags are compliant and validated by ACTRIS, they are made available on Ebas, which is the ACTRIS open-source database. The 2020-2021 dataset presented here can therefore be found on the corresponding website under <https://ebas-data.nilu.no>.”*

78) 3.1 I suggest using statistics (like correlations or heatmap) to group compounds, as in the city you have many different sources, and perhaps what is expected may not be the reality. And also have you considered doing a positive matrix factorization? This could really help on source identification.

*The compounds are not grouped by sources here, as these might differ for a single m/z throughout the year. Some correlations are provided in Table S5 for the winter seasons. Preliminary PMF runs were indeed performed but a thorough PMF analysis is beyond the scope of the present paper.*

79) Line 242: this statement about methanol and acetone is inconsistency with Figure 4, oxygenated compounds have even higher yaxis.

*This sentence is rephrased as: “Methanol and acetone were separated from the other oxygenated VOC due to their concentration (2-3 times higher than other individual oxygenated compounds) and for the sake of clarity in the next graphs.”*

80) Line 246. I really do not understand why you pass to concentrations when comparing ppb across other literature could be valuable. The only thing I need to know is that you indeed use real temp and atm pressure data to calculate this, per point. Correct?

All figures will be redone with the values in ppb.

81) Line 258: you keep saying isoprene is the most important biogenic compound, and this is not true. It may be the most copiously emitted, but there are species who do not emit isoprene. So rephrase these statements.

In the revised version, this is rephrased as: *“Within the non-aromatic hydrocarbons, monoterpenes have roughly the same boxplot values than isoprene; indeed, monoterpene levels can be as high or higher than isoprene levels in urban regions (Panopoulou et al, 2020), indicating other sources than the biogenic one.”*

82) Why are monoterpene concentrations important during winter? And why only in winter, if it is a source from the city, (i.e. perfumery, or cleaning products industry) wouldn't it be all over the year?

This sentence is rephrased as: *“The high median value of m/z 137 could be explained by an important wintertime contribution (Figure 4).”*

83) Despite im not really happy with a figure 2 because it does not give you much info as it is averaged over summer and winter and day and night, so I expect a huge variability, I do not know what is the purpose of figure 3. Please rephrase the purpose of the figure or remove.

Figure 2 gives an overview of the statistical range, while the seasonal and diurnal variabilities are discussed using Figures 4, 7 and 8. Following both reviewers' suggestion, Figure 3 is removed in the revised version.

3.2.

84) Are the trajectories more dominant in particular seasons? Please also state this.

Table R6 (Table S7 in the revised paper) presents the percentage of air mass clusters per season and this sentence is updated in the main text: *“Continental air masses and air masses from the North are more dominant in Spring (around 40%), while the oceanic 1 cluster is more occurrent in Winter (45%, Table S7).”*

Table R4: Percentage of occurrence of air mass clusters per season

| %            | DJF | MAM | JJA | SON |
|--------------|-----|-----|-----|-----|
| Continental  | 21  | 37  | 18  | 23  |
| Anticyclonic | 26  | 20  | 24  | 31  |
| Oceanic 1    | 45  | 13  | 23  | 19  |
| Oceanic 2    | 26  | 21  | 29  | 24  |
| North 1      | 13  | 35  | 28  | 24  |
| North 2      | 16  | 40  | 17  | 27  |

3.3

85) Line 381: where does the 77% come from?

This sentence is rephrased as: *“On Figure 8 c, the sum of isoprene and furan shows a more biogenic diurnal cycle because isoprene is dominant (77%, Table 2), with an increasing level in the morning due to enhanced emission with higher temperature and solar radiation.”*

4.

86) Explain what flags are

This is explained in Section 2.4.1 (where internal & external quality checks are described), see comment 77.

## References

- Chiriaco, M., Dupont, J.-C., Bastin, S., Badosa, J., Lopez, J., Haeffelin, M., Chepfer, H., and Guzman, R.: ReOBS: a new approach to synthesize long-term multi-variable dataset and application to the SIRTAsupersite, *Earth Syst. Sci. Data*, 10, 919–940, <https://doi.org/10.5194/essd-10-919-2018>, 2018.
- Haeffelin, M., Barthès, L., Bock, O., Boitel, C., Bony, S., Bouniol, D., Chepfer, H., Chiriaco, M., Cuesta, J., Delanoë, J., Drobinski, P., Dufresne, J.-L., Flamant, C., Grall, M., Hodzic, A., Hourdin, F., Lapouge, F., Lemaître, Y., Mathieu, A., Morille, Y., Naud, C., Noël, V., O'Hirok, W., Pelon, J., Pietras, C., Protat, A., Romand, B., Scialom, G., and Vautard, R.: SIRTAsupersite, a ground-based atmospheric observatory for cloud and aerosol research, *Ann. Geophys.*, 23, 253–275, <https://doi.org/10.5194/angeo-23-253-2005>, 2005.
- Holzinger, R.: PTRwid: A new widget tool for processing PTR-TOF-MS data, *Atmos. Meas. Tech.*, 8, 3903–3922, <https://doi.org/10.5194/amt-8-3903-2015>, 2015.
- Kotthaus, S. and Grimmond, C. S. B.: Atmospheric boundary-layer characteristics from ceilometer measurements. Part 1: A new method to track mixed layer height and classify clouds, *Quarterly Journal of the Royal Meteorological Society*, 144, 1525–1538, <https://doi.org/10.1002/qj.3299>, 2018.
- Lindinger, W., Jordan, A., and Hansel, A.: Proton-transfer-reaction mass spectrometry (PTR-MS): on-line monitoring of volatile organic compounds at pptv levels, *Chem. Soc. Rev.*, 27, 347, <https://doi.org/10.1039/a827347z>, 1998.
- Španěl, P., Wang, T., and Smith, D.: A selected ion flow tube, SIFT, study of the reactions of H<sub>3</sub>O<sup>+</sup>, NO<sup>+</sup> and O<sub>2</sub><sup>+</sup> ions with a series of diols, *International Journal of Mass Spectrometry*, 218, 227–236, [https://doi.org/10.1016/S1387-3806\(02\)00724-8](https://doi.org/10.1016/S1387-3806(02)00724-8), 2002.
- Zhao, J. and Zhang, R.: Proton transfer reaction rate constants between hydronium ion (H<sub>3</sub>O<sup>+</sup>) and volatile organic compounds, *Atmospheric Environment*, 38, 2177–2185, <https://doi.org/10.1016/j.atmosenv.2004.01.019>, 2004.
