# Supplementary material for: Two years of Volatile Organic Compounds online in-situ measurements at SIRTA (Paris region, France) using Proton-Transfer-Reaction Mass Spectrometry
Source: Copernicus journal article supplement (doi:10.5194/essd-2022-406), 2022-12-05
Supplement: Supplementary file [file essd-2022-406-AC3-supplement.pdf]

Dear Editor,

We thank you for your attention to our manuscript. We responded point by point to the reviewers' comments herewith, and we updated the revised version in order to provide more details on the used quality assurance and quality control procedures, including the description of calibration protocols, supplementary tables and figures evaluating the quality of the data. Furthermore, a new section is added where our dataset for the suburban SIRTA station is compared for some compounds with independent measurements provided by the regional network for air quality monitoring of the Greater Paris area (AirParif) in the center of Paris. This is why a new author (Alexia Baudic from Airparif) is added in the revised manuscript.

Please note that the guidelines for the data treatment and validation from the European infrastructure for aerosols, clouds, and trace gases (ACTRIS) are being finalized and therefore improvements can still be done to reduce the uncertainty; nevertheless, we think that we have produced and presented a robust dataset which can feed a wide user community.

Please also note that we now underline the need of harmonized protocols for PTR-MS long-term measurements in the conclusions, as follows:

*“In this paper, we provide the first long-term VOC dataset obtained using PTR-MS measurements at a suburban site in Europe. This two-year dataset contains 31 mass-to-charge ratios ( $m/z$ ) corresponding to 30+ compounds of interest for atmospheric chemistry research, identified thanks to additional PTR-ToF-MS measurements. Because long-term PTR-MS measurements are still scarce worldwide, we adapted existing recommendations in order to meet the inherent requirements of pluri-annual observations. Data have been carefully inspected following quality control and quality assurance procedures, resulting in a robust dataset. Since long-term PTR-MS measurements are likely to be implemented in a growing number of stations (especially within ACTRIS), harmonized protocols and guidelines are much needed in order to ensure the comparability of the data.”*
